# Supplementary material for: Blue-shifted emission and enhanced quantum efficiency via π-bridge elongation in carbazole–carborane dyads
Source: Royal Society of Chemistry journal article supplement (doi:10.1039/c6cp02870e), 2016-01-01
Supplement: c6cp02870e1.pdf [file c6cp02870e1.pdf]

## Supporting Information

### Blue-shifted emission and enhanced quantum efficiency via $\pi$ -bridge elongation in carbazole-carborane dyads

Zhaojin Wang,<sup>a</sup> Peng Jiang,<sup>a</sup> Tianyu Wang,<sup>a</sup> Graeme J. Moxey,<sup>b</sup> Marie P. Cifuentes,<sup>a,b</sup> Chi Zhang,<sup>a,\*</sup> and Mark G. Humphrey<sup>a,b,\*</sup>

---

<sup>a</sup> School of Chemical and Material Engineering, Jiangnan University, Wuxi 214122, Jiangsu Province, China.

E-mail: mark.humphrey@jiangnan.edu.cn.

<sup>b</sup> Research School of Chemistry, Australian National University, Canberra, ACT 2601, Australia.

E-mail: Mark.Humphrey@anu.edu.au.

## Contents

|                                                                                                                     |     |
|---------------------------------------------------------------------------------------------------------------------|-----|
| <b>1 Spectrum and crystal</b>                                                                                       | S3  |
| 1.1 $^1\text{H}$ , $^{13}\text{C}$ and $^{11}\text{B}$ NMR Spectra of <b>M-1, M-2, M-3, D-1, D-2</b> and <b>D-3</b> | S3  |
| 1.2 X-ray structural study of <b>D-3</b>                                                                            | S9  |
| <b>2. Determination of photophysical properties</b>                                                                 | S10 |
| 2.1 Absorption spectra of the V-shaped and linear <i>o-Cb</i> dyads in different solvents                           | S10 |
| 2.2 PL spectra of the V-shaped and linear <i>o-Cb</i> dyads                                                         | S11 |
| 2.3 Comparison of PL of <i>o-Cb</i> dyads at different excitation wavelengths                                       | S12 |
| 2.4 Estimation of the dipole moment of V-shaped <i>o-Cb</i> dyads in the excited state                              | S13 |
| <b>3. Theoretical calculations</b>                                                                                  | S14 |
| 3.1 Ground state calculations                                                                                       | S14 |
| 3.2 Excited state calculations                                                                                      | S18 |
| 3.3 Cartesian coordinates of <i>o-Cb</i> dyads in the ground state                                                  | S21 |
| 3.4 Cartesian coordinates of <i>o-Cb</i> dyads in the excited state                                                 | S30 |
| <b>4. References</b>                                                                                                | S38 |

# 1. Spectrum and crystal

## 1.1 $^1\text{H}$ , $^{13}\text{C}$ and $^{11}\text{B}$ NMR Spectra of *o*-Cb dyads

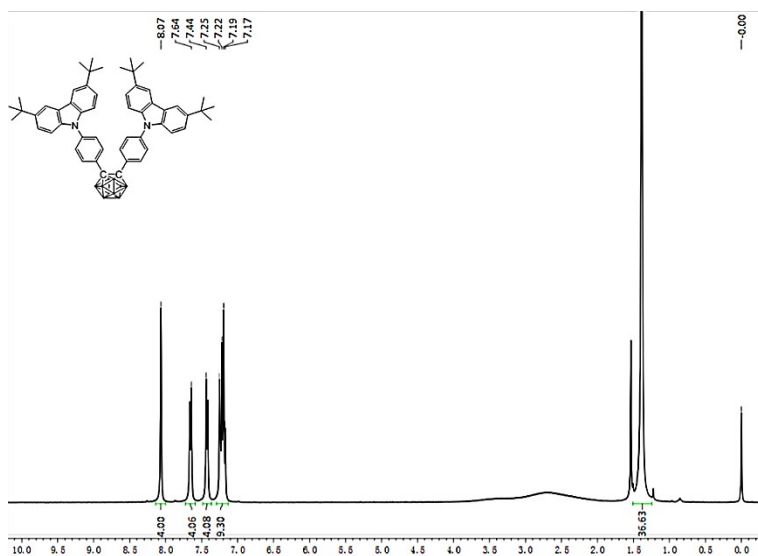

$^1\text{H}$  NMR spectrum of D-1 ( $\text{CDCl}_3$ )

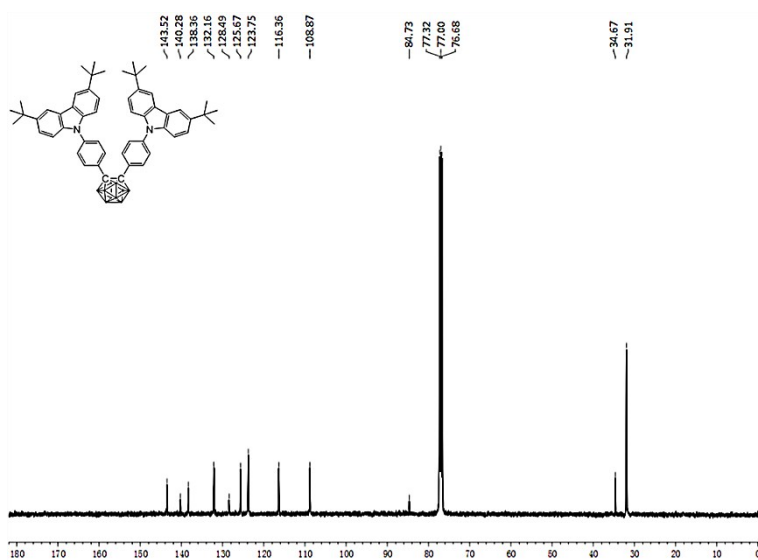

$^{13}\text{C}$  NMR spectrum of D-1 ( $\text{CDCl}_3$ )

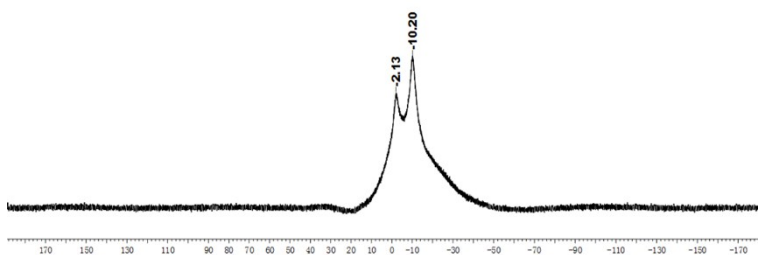

$^{11}\text{B}$   $\{^1\text{H}\}$  NMR spectrum of D-1 ( $\text{CDCl}_3$ )

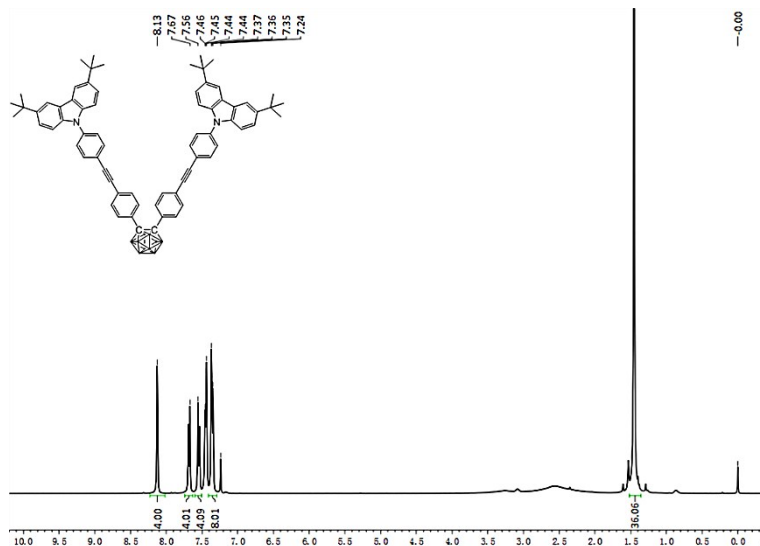

**<sup>1</sup>H NMR spectrum of D-2 (CDCl<sub>3</sub>)**

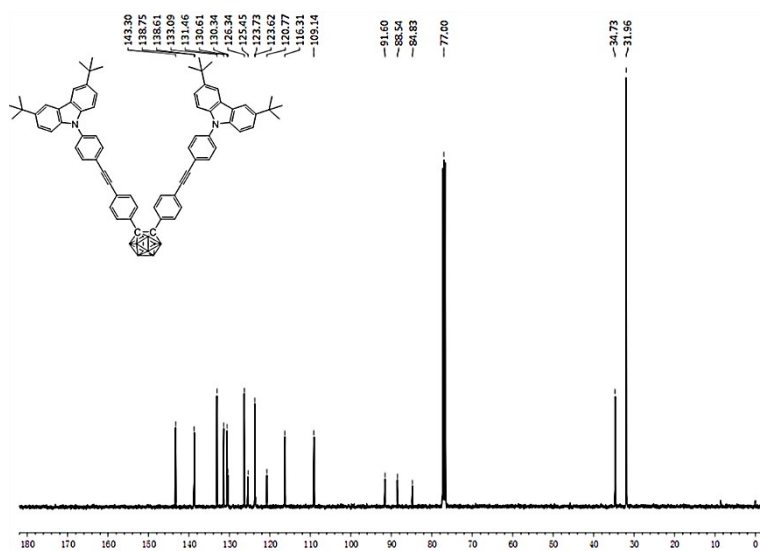

**<sup>13</sup>C NMR spectrum of D-2 (CDCl<sub>3</sub>)**

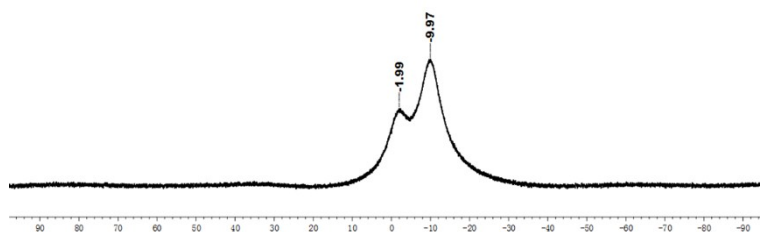

**<sup>11</sup>B {<sup>1</sup>H} NMR spectrum of D-2 (CDCl<sub>3</sub>)**

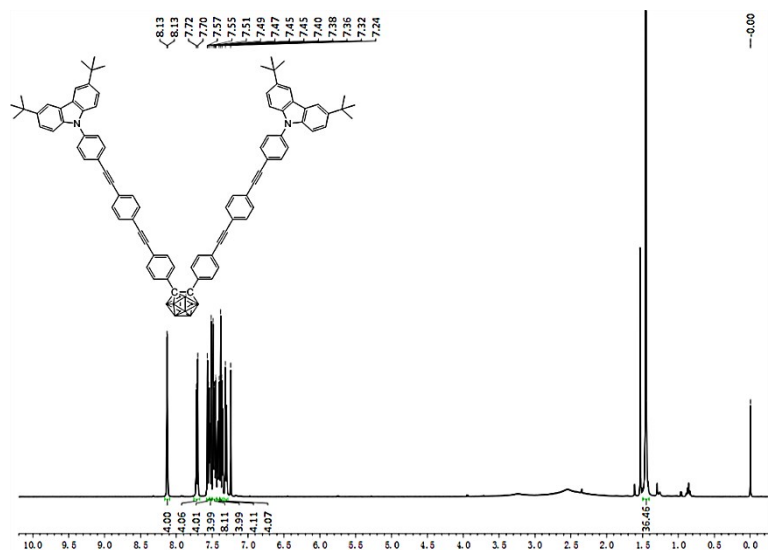

<sup>1</sup>H NMR spectrum of D-3 (CDCl<sub>3</sub>)

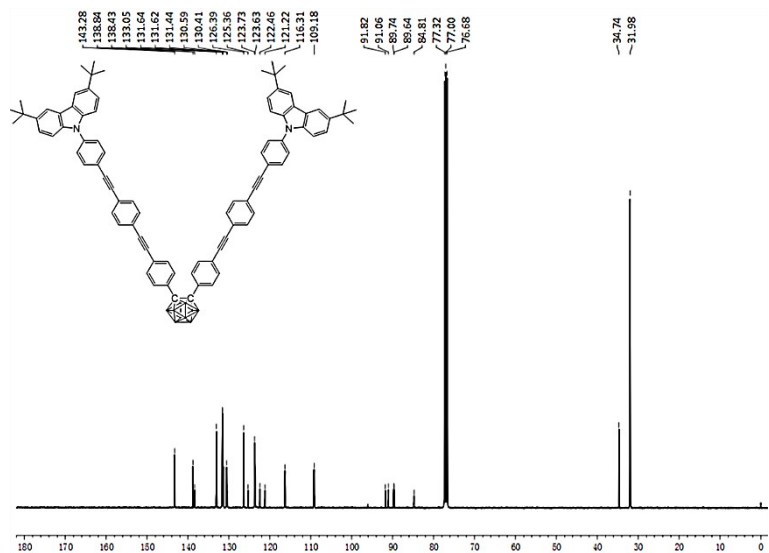

<sup>13</sup>C NMR spectrum of D-3 (CDCl<sub>3</sub>)

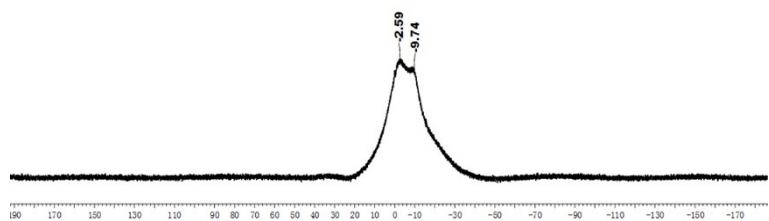

<sup>11</sup>B {<sup>1</sup>H} NMR spectrum of D-3 (CDCl<sub>3</sub>)

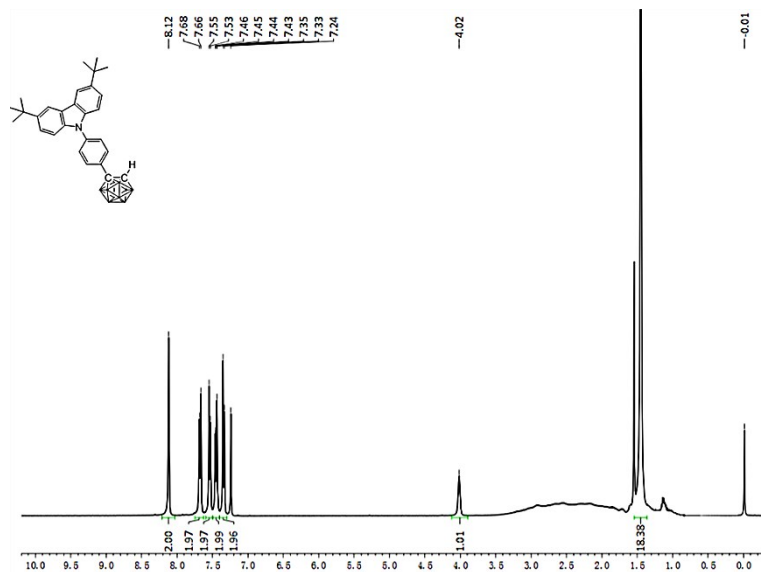

<sup>1</sup>H NMR spectrum of M-1 (CDCl<sub>3</sub>)

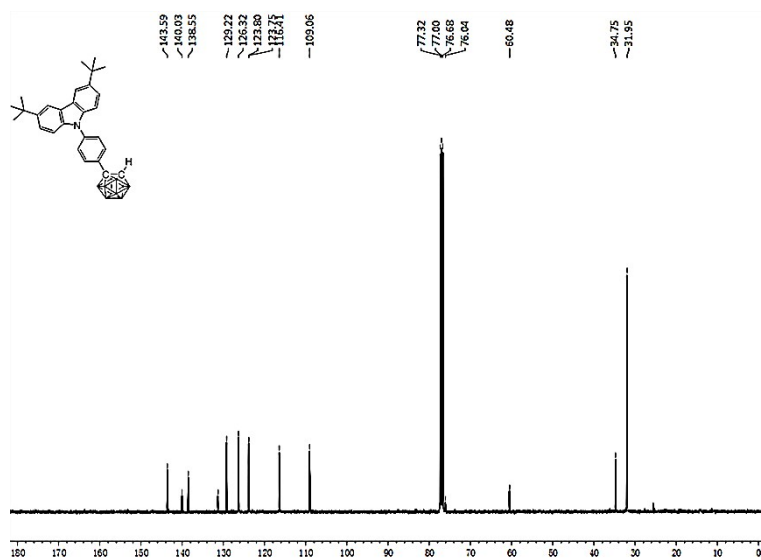

<sup>13</sup>C NMR spectrum of M-1 (CDCl<sub>3</sub>)

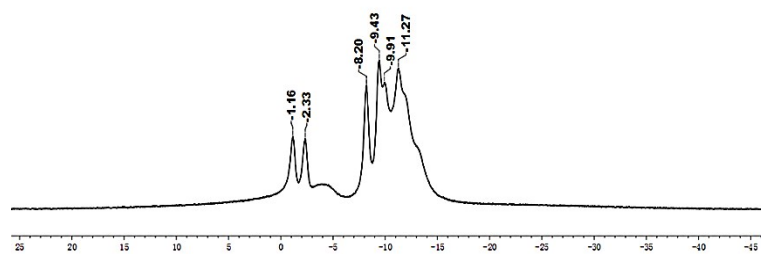

<sup>11</sup>B {<sup>1</sup>H} NMR spectrum of M-1 (CDCl<sub>3</sub>)

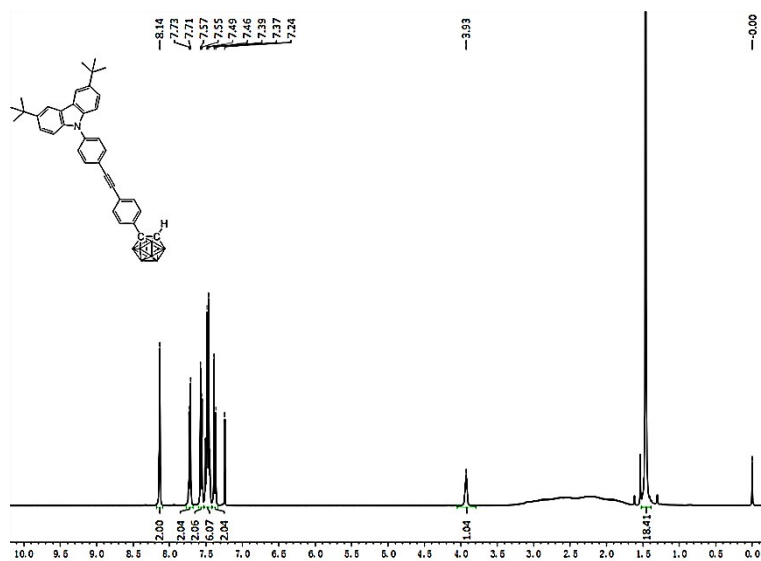

**<sup>1</sup>H NMR spectrum of M-2 (CDCl<sub>3</sub>)**

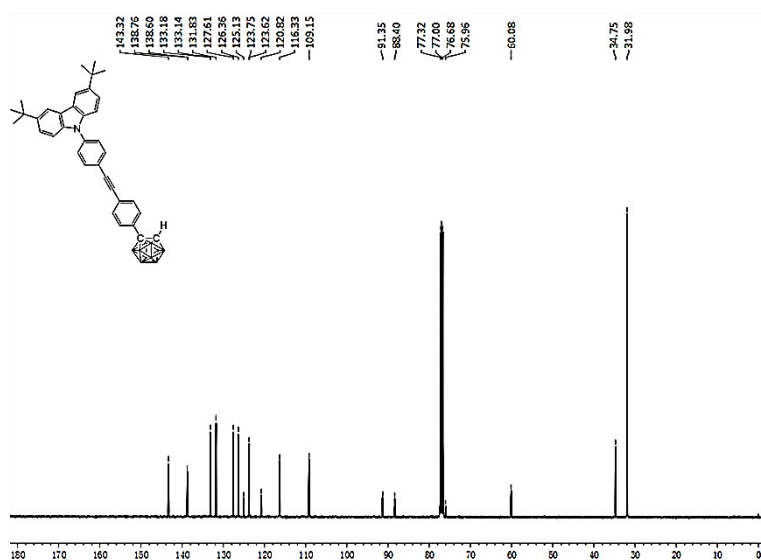

**<sup>13</sup>C NMR spectrum of M-2 (CDCl<sub>3</sub>)**

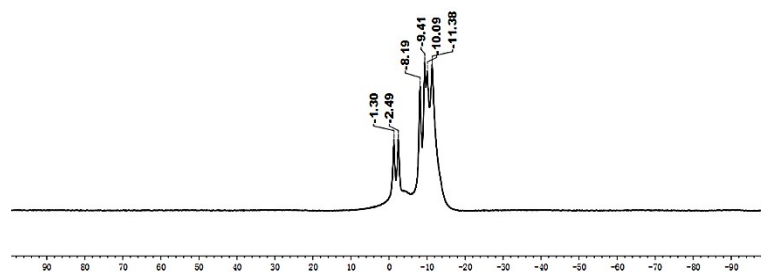

**<sup>11</sup>B {<sup>1</sup>H} NMR spectrum of M-2 (CDCl<sub>3</sub>)**

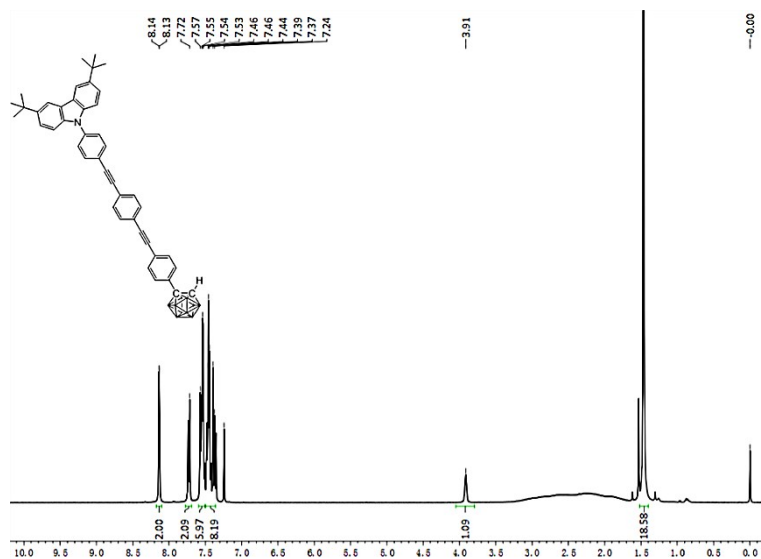

**<sup>1</sup>H NMR spectrum of M-3 (CDCl<sub>3</sub>)**

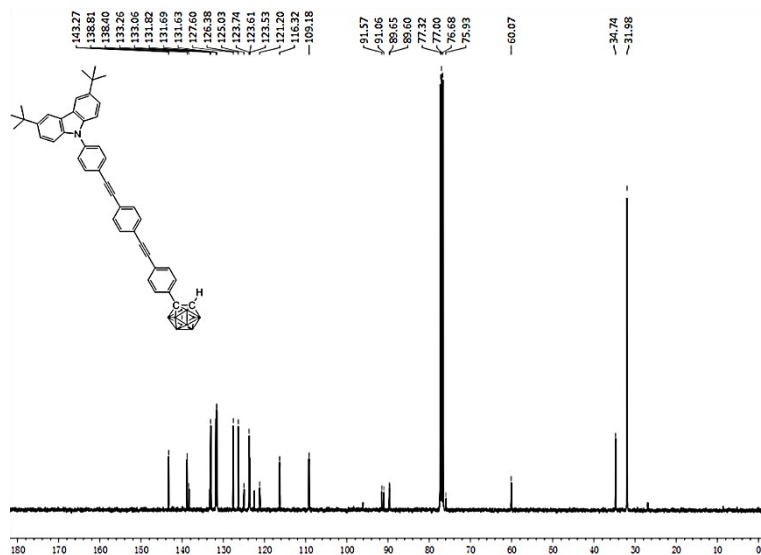

**<sup>13</sup>C NMR spectrum of M-3 (CDCl<sub>3</sub>)**

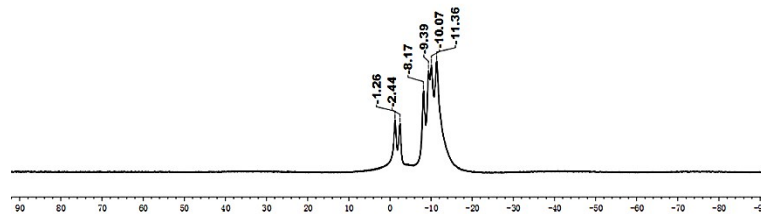

**<sup>11</sup>B {<sup>1</sup>H} NMR spectrum of M-3 (CDCl<sub>3</sub>)**



## 1.2 X-ray structural study of D-3

Crystals of **D-3** suitable for the X-ray structural analysis were grown by controlled cooling of a hot hexane/carbon tetrachloride (1:1) solution. A suitable crystal was mounted on a MicroMount (MiTeGen) using Paratone-N oil (Hampton Research) and cooled rapidly to 150 K using an Oxford Cryosystems low-temperature device.<sup>51</sup> Intensity data were collected on an Agilent SuperNova CCD diffractometer using mirror-monochromated Cu-K $\alpha$  radiation ( $\lambda = 1.54184 \text{ \AA}$ ).  $N_t$  (total) reflections were measured by using omega scans and were reduced to  $N_o$  unique reflections, with  $F_o > 2\sigma(F_o)$  being considered to be observed. The crystal was face-indexed, and a Gaussian grid<sup>52</sup> absorption correction with beam profile correction was applied. The structure was solved using direct methods and observed reflections were used in least-squares refinement on  $F^2$ , with anisotropic thermal parameters refined for non-hydrogen atoms. Hydrogen atoms were constrained in calculated positions and refined with a riding model. Programs used were CrysAlisPro<sup>53</sup> (control and integration), and SHELXS-97,<sup>54</sup> SHELXL-2014<sup>55</sup>, Olex2<sup>56</sup> and Ortep in combination with POV-Ray (structure solution and refinement and molecular graphics). Crystallographic data for the structural analysis have been deposited with the Cambridge Crystallographic Data Centre, CCDC number 1457766. Copies of this information may be obtained, free of charge, from the Director, CCDC, 12 Union Road, Cambridge CB2 1E2, UK (fax: +44-1223-336033; e-mail: deposit@ccdc.cam.ac.uk or www: <http://www.ccdc.cam.ac.uk>). *Crystal data*: C<sub>86</sub>H<sub>82</sub>B<sub>10</sub>N<sub>2</sub>,  $M = 1251.63$ , colourless block,  $0.38 \times 0.06 \times 0.05 \text{ mm}^3$ , monoclinic, space group  $C2/c$ ,  $a = 20.1102(8)$ ,  $b = 26.5248(7)$ ,  $c = 21.3634(5) \text{ \AA}$ ,  $\beta = 93.228(3)^\circ$ ,  $V = 1377.6(6) \text{ \AA}^3$ ,  $Z = 4$ ,  $D_c = 0.731 \text{ g/cm}^3$ ,  $\vartheta_{\min} = 3.4^\circ$ ,  $\vartheta_{\max} = 72.3^\circ$ , 40829 reflections collected, 11080 unique ( $R_{\text{int}} = 0.0460$ ). Final  $\text{Goof} = 1.04$ ,  $R_1 = 0.0634$ ,  $wR_2 = 0.1817$ ,  $R$  indices based on 7088 reflections with  $I > 2\sigma(I)$ , 448 parameters, 0 restraints,  $\mu = 0.300 \text{ mm}^{-1}$ ,  $(\Delta/\rho)_{\min} -0.16 \text{ e \AA}^{-3}$ ,  $(\Delta/\rho)_{\max} 0.37 \text{ e \AA}^{-3}$ . Disordered lattice solvent molecules could not be modelled and were therefore removed from the refinement using PLATON SQUEEZE.<sup>57</sup>

## 2. Determination of photophysical properties

### 2.1 Absorption spectra of the V-shaped and linear *o*-Cb dyads in different solvents

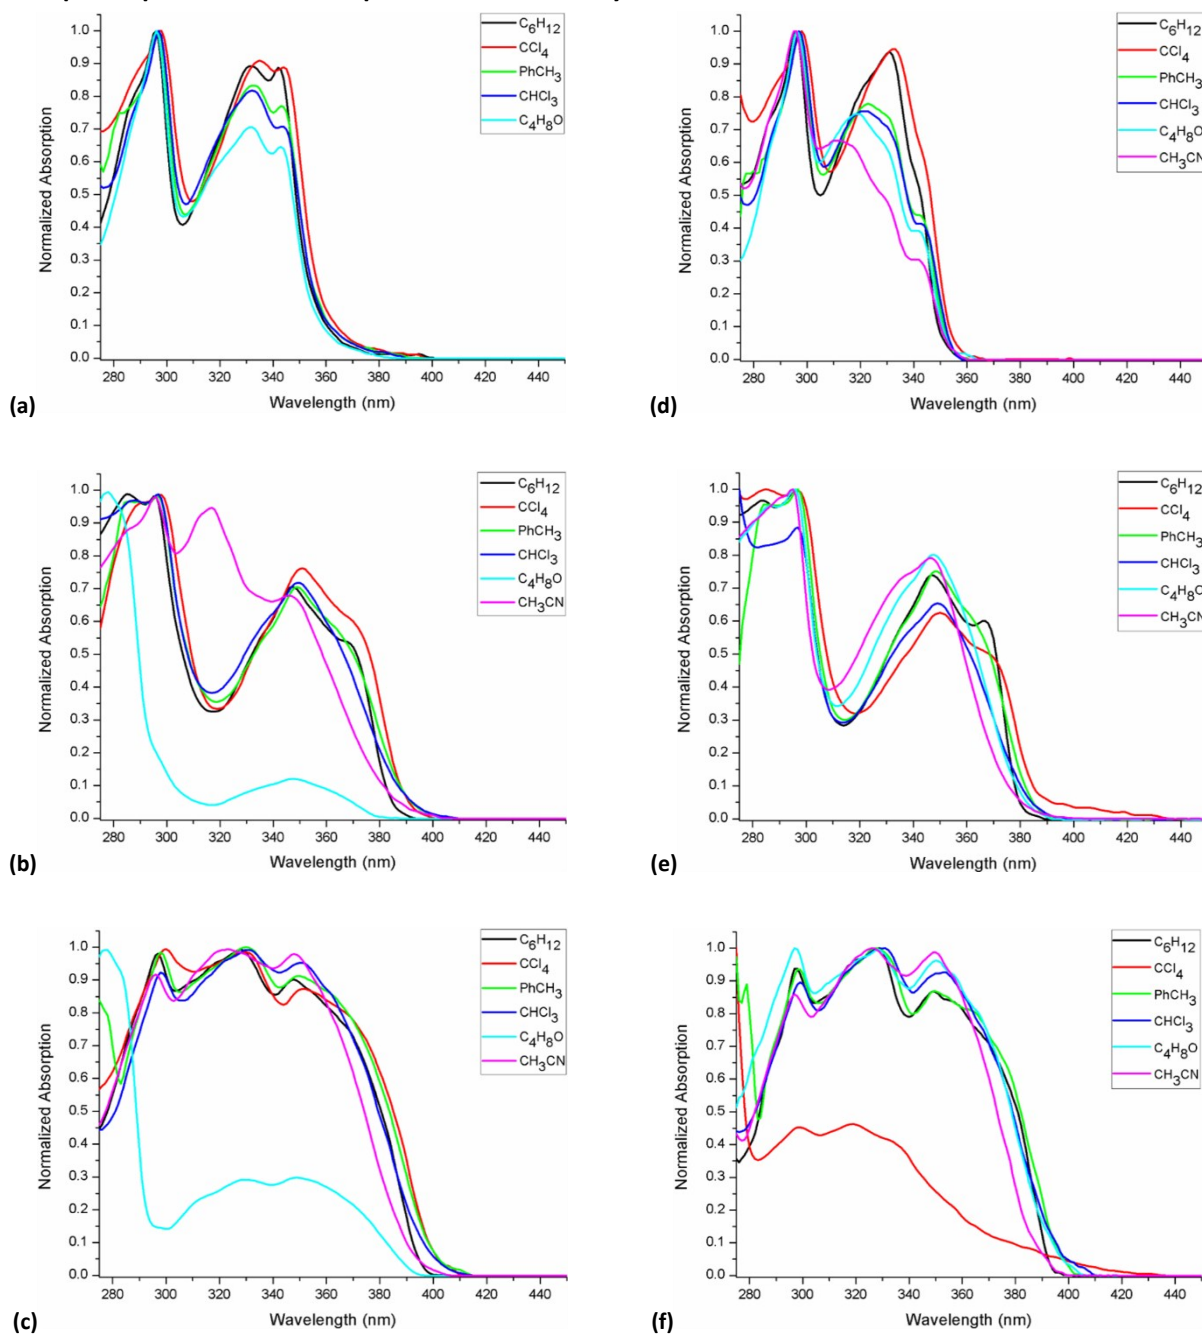

**Fig. S2.1** Normalized absorption spectra of the *o*-Cb dyads in different solvents: **D-1** (a), **D-2** (b), **D-3** (c), **M-1** (d), **M-2** (e) and **M-3** (f) at concentrations of 2  $\mu$ M. Note that **D-1** is insoluble in  $CH_3CN$ .  $C_6H_{12}$  = cyclohexane,  $PhCH_3$  = toluene,  $C_4H_8O$  = tetrahydrofuran (THF).

## 2.2 PL spectra of the V-shaped and linear *o*-Cb dyads

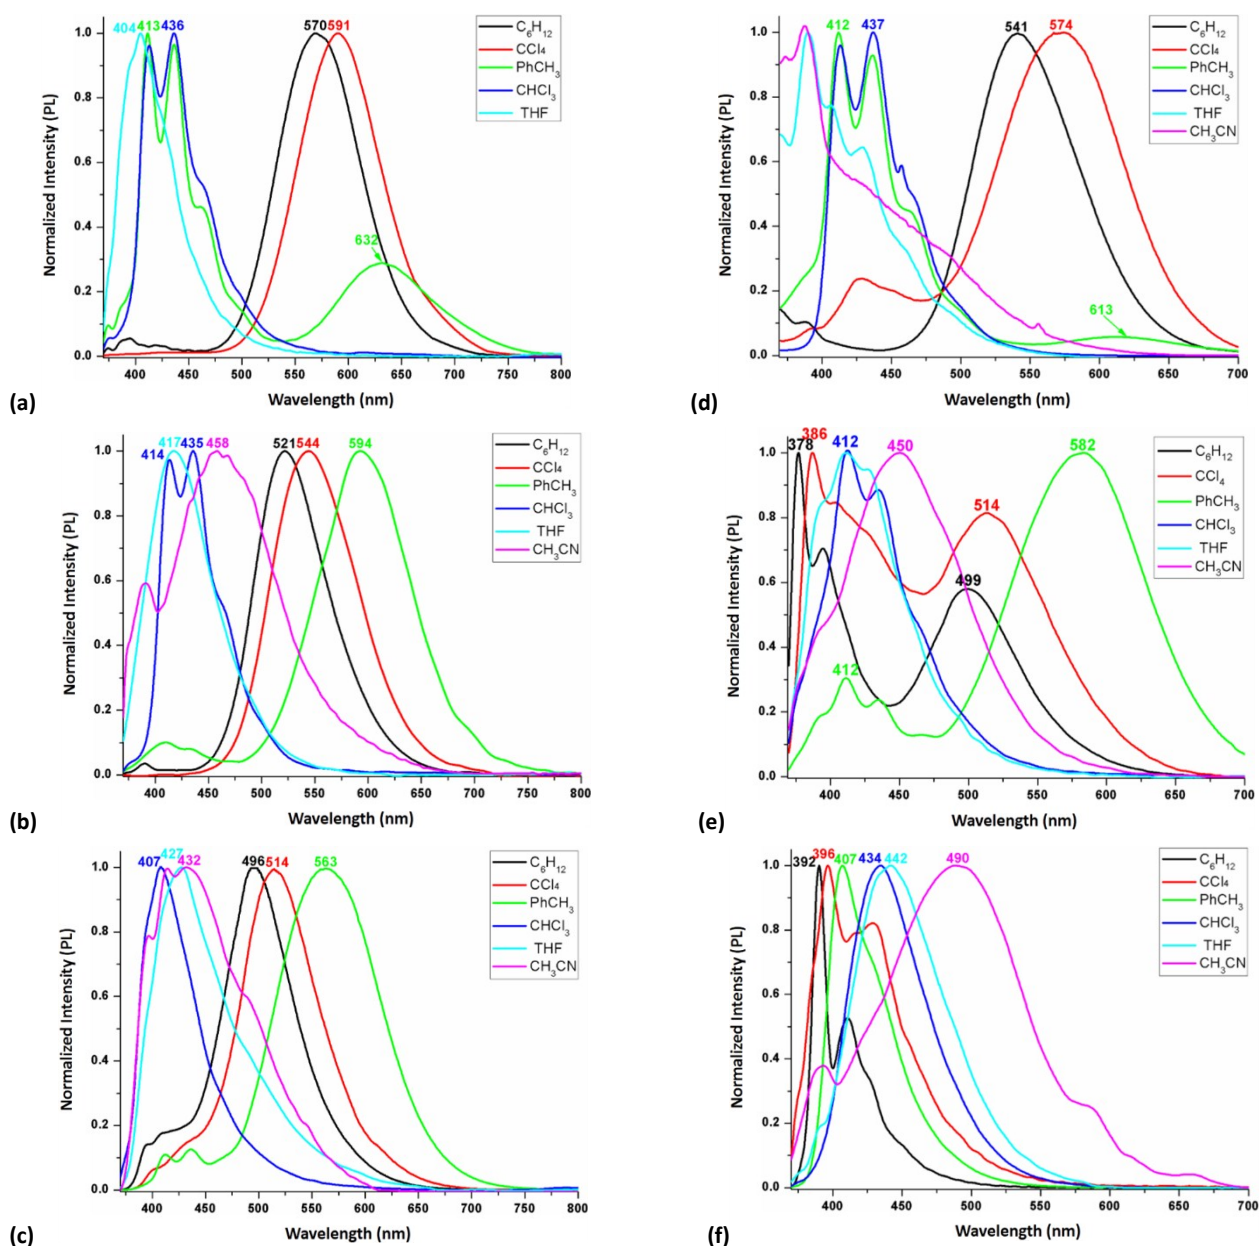

Fig. S2.2 Normalized PL spectra of *o*-Cb dyads in different solvents: D-1 (a), D-2 (b), D-3 (c), M-1 (d), M-2 (e) and M-3 (f).

Table S1. Summary of quantum efficiency (QE) of *o*-Cb dyads in different solvents.

| QE* | C <sub>6</sub> H <sub>12</sub> | CCl <sub>4</sub> | Toluene | CHCl <sub>3</sub> | THF  | CH <sub>3</sub> CN |
|-----|--------------------------------|------------------|---------|-------------------|------|--------------------|
| D-1 | 10.2 %                         | 7.1%             | 5.5%    | 1%                | 0.3% | < 0.1%             |
| D-2 | 16%                            | 35%              | 18%     | 1.1%              | 0.4% | 0.4%               |
| D-3 | 11%                            | 6%               | 16%     | 1.8%              | 0.1% | < 0.1%             |
| M-1 | 2.3%                           | 0.8%             | 4.6%    | 5%                | 0.4% | 0.4%               |
| M-2 | 13.9%                          | 3.6%             | 18.6%   | 0.3%              | 0.1% | < 0.1%             |
| M-3 | 86.2%                          | 7.5%             | 85.3%   | 8.4%              | 2.2% | 0.3%               |

\*Quinine sulfate solution as standard ( $\Phi = 0.546$ ).

### 2.3 Comparison of PL of *o*-Cb dyads at different excitation wavelengths

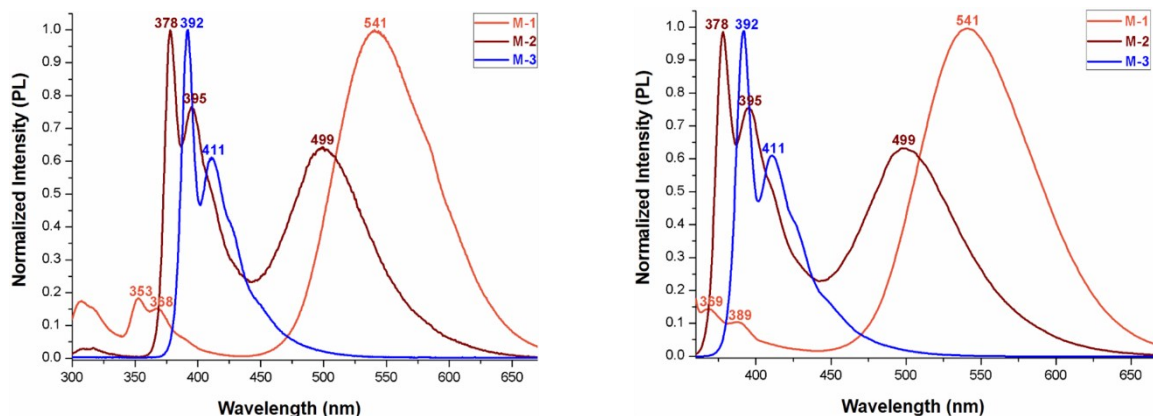

Fig. S2.3 Normalized PL of M-1, M-2 and M-3 (20  $\mu$ M) in cyclohexane, excited at 290 nm (left) and 350 nm (right)

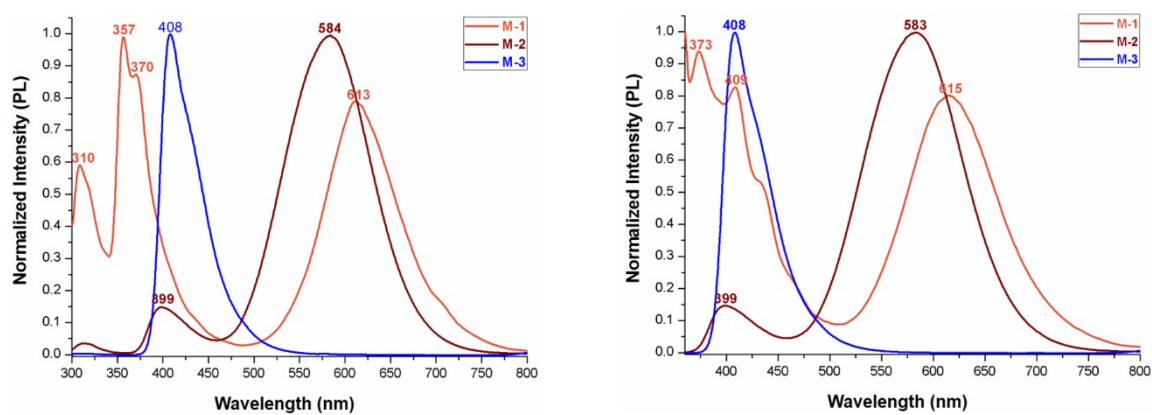

Fig. S2.4 Normalized PL of M-1, M-2 and M-3 (20  $\mu$ M) in toluene, excited at 290 nm (left) and 350 nm (right)

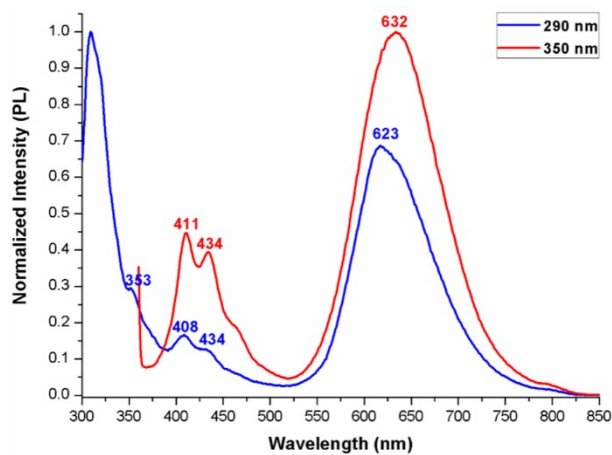

Fig. S2.5 Normalized PL of D-1 (20  $\mu$ M) in toluene, excited at 290 nm and 350 nm

## 2.4 Estimation of the dipole moment of V-shaped *o*-Cb dyads in the excited state

The dipole moments of the V-shaped *o*-Cb dyads were estimated from the Mataga–Lippert equation:

$$V - V_f = \frac{2(\mu_e - \mu_g)^2}{hca^3} \Delta f, \quad \Delta f = \left( \frac{\epsilon - 1}{2\epsilon + 1} - \frac{n^2 - 1}{2n^2 + 1} \right), \quad \mu_e - \mu_g = \sqrt{\frac{Shca^3}{2}}, \quad S = \frac{V_1 - V_2}{\Delta f_1 - \Delta f_2}$$

where  $\mu_e$  and  $\mu_g$  are the dipole moments in the excited and ground states, respectively,  $c$  is the velocity of light,  $h$  is Planck's constant,  $S$  is the slope of the plots and  $a$  is the radius of the Onsager cavity around the fluorophore. The solvent dielectric constant ( $\epsilon$ ) and refraction index ( $n$ ) are included in the term,  $\Delta f$ . The Onsager radii were obtained from the optimized excited state structures obtained from TD-DFT calculations at the 6-31g (d, p) level of theory, and were taken as half of the distance between the N atom and the carborane cluster. The value of  $\mu_g$  was obtained by DFT calculations of the ground states.

**Table S2. Dipole moments ( $\mu_e$ ) of D-1, D-2 and D-3 in the excited state obtained from Mataga-Lippert plots.**

| Compound | Radius/Å ( $a$ )  | $S / \text{cm}^{-1}$ | $\mu_e - \mu_g / \text{D}$ | $\mu_g / \text{D}$ | $\mu_e / \text{D}$ |
|----------|-------------------|----------------------|----------------------------|--------------------|--------------------|
| D-1      | 3.21              | 282194.32            | 30                         | 5                  | 35                 |
| D-2      | 6.55              | — <sup>#</sup>       | 87                         | 5                  | 92                 |
| D-3      | 9.98 <sup>*</sup> | — <sup>#</sup>       | 164                        | 5                  | 169                |

<sup>\*</sup> optimized at the 6-31g level of theory. <sup>#</sup> using the same  $S$  value as D-1.

## 3. Theoretical calculations

### 3.1 TD-DFT calculations at the ground state

**Table S3. Summary of electronic transitions of all *o*-Cb dyads from the ground state to the lowest five excited states**

|            | $\lambda_{\text{calc}}$ | $f$    | Assignment (>5%)                                                                                                                                               |            | $\lambda_{\text{calc}}$ | $f$    | Assignment (>5%)                                                        |
|------------|-------------------------|--------|----------------------------------------------------------------------------------------------------------------------------------------------------------------|------------|-------------------------|--------|-------------------------------------------------------------------------|
| <b>D-1</b> | 290.78                  | 0.1728 | H-1 → L (44.4%); H-1 → L+1 (6.4%); H → L (13.8%);<br>H → L+1 (35.4%)                                                                                           | <b>M-1</b> | 281.87                  | 0.4365 | H → L (93.6%); H → L+1 (6.4%)                                           |
|            | 284.32                  | 0.5342 | H-1 → L (17.8%); H-1 → L+1 (21.5%); H-1 → L+2 (10.8%);<br>H → L (39.5%); H → L+1 (10.4%)                                                                       |            | 275.61                  | 0.0001 | H-1 → L+4 (8.8%); H → L (7.2%); H → L+1 (84.0%);                        |
|            | 281.82                  | 0.0200 | H-1 → L+3 (11.0%); H → L+2 (27.5%); H → L+3 (42.1%);<br>H → L+4 (6.6%)                                                                                         |            | 257.69                  | 0.0029 | H-4 → L (7.4%); H-3 → L+2 (5.5%); H → L+2 (87.1%);                      |
|            | 280.8                   | 0.0176 | H-1 → L (5.4%); H-1 → L+2 (58.2%); H-1 → L+3 (7.5%);<br>H → L (6.5%); H → L+3 (14.2%)                                                                          |            | 248.45                  | 0.1675 | H-1 → L+1 (82.0%); H → L+4 (12.5%);                                     |
|            | 3                       | 0.0065 | H → L (14.8%); H → L+1 (17.9%); H → L+3 (5.9%);                                                                                                                |            | 240.34                  | 0.0002 | H-1 → L (89.4%)                                                         |
|            | 262.02                  |        | H → L+4 (28.8%); H → L+5 (26.8%)                                                                                                                               |            |                         |        |                                                                         |
| <b>D-2</b> | 319.41                  | 0.8205 | H-5 → L (7.9%); H-4 → L+1 (6.1%); H-1 → L (42.1%);<br>H → L+1 (38.6%)                                                                                          | <b>M-2</b> | 314.73                  | 1.3248 | H-2 → L (8.9%); H → L (82.5%); H → L+3 (8.6%)                           |
|            | 311.11                  | 1.6579 | H-1 → L+1 (40.8%); H → L (45.4%)                                                                                                                               |            | 278.29                  | 0.0276 | H-1 → L+6 (9.4%); H → L+1 (86.0%)                                       |
|            | 278.45                  | 0.0155 | H-1 → L+2 (35.5%); H-1 → L+4 (8.5%); H → L+3 (44.1%)                                                                                                           |            | 262.96                  | 0.5767 | H-2 → L (88.3%); H → L+3 (7.3%)                                         |
|            | 278.38                  | 0.0461 | H-1 → L+3 (44.0%); H → L+2 (35.6%); H → L+4 (8.6)                                                                                                              |            | 256.67                  | 0.0034 | H-4 → L (11.8%); H → L+4 (76.8%)                                        |
|            | 266.57                  | 0.2601 | H-5 → L (50.1%); H-4 → L+1 (37.1%); H → L+1 (6.2%)                                                                                                             |            | 254.72                  | 0.0004 | H-1 → L (88.9%); H-1 → L+3 (11.1%)                                      |
| <b>D-3</b> | 339.32                  | 1.5156 | H-5 → L (14.9%); H-4 → L+1 (11.9%); H-1 → L (25.4%);<br>H-1 → L+1 (9.7%); H → L (8.1%); H → L+1 (20.8%)                                                        | <b>M-3</b> | 333.97                  | 2.6162 | H-2 → L (25.5%); H → L (62.6%); H → L+1 (9.4%)                          |
|            | 329.94                  | 3.5488 | H-5 → L (6.2%); H-4 → L (5.0%); H-4 → L+1 (7.6%);<br>H-1 → L (21.8%); H-1 → L+1 (9.1%); H → L (10.9%);<br>H → L+1 (26.3%)                                      |            | 288.24                  | 0.2665 | H-2 → L (62.5%); H → L (10.7%); H → L+1 (18.7%)                         |
|            | 290.58                  | 0.0953 | H-5 → L (28.4%); H-5 → L+1 (6.0%); H-4 → L (5.4%);<br>H-4 → L+1 (20.2%); H-1 → L (5.3%); H-1 → L+2 (7.7%);<br>H-1 → L+3 (5.6%); H → L+1 (5.4%); H → L+3 (5.8%) |            | 278.85                  | 0.0368 | H-2 → L+2 (11.0%); H-1 → L+8 (9.2%); H → L+2 (79.8%)                    |
|            | 286.28                  | 0.4114 | H-5 → L (20.7%); H-5 → L+1 (12.3%); H-4 → L (17.6%);<br>H-4 → L+1 (25.0%); H → L+2 (5.3%); H → L+3 (6.1%)                                                      |            | 256.89                  | 0.0001 | H-1 → L (78.1%); H-1 → L+1 (17.9%)                                      |
|            | 278.84                  | 0.0324 | H-5 → L+5 (11.4%); H-3 → L+15 (9.2%); H-1 → L+5 (79.4%)                                                                                                        |            | 256.79                  | 0.0035 | H-6 → L (7.2%); H-6 → L+1 (7.3%); H-3 → L+4 (5.1%);<br>H → L+4 (77.7%); |

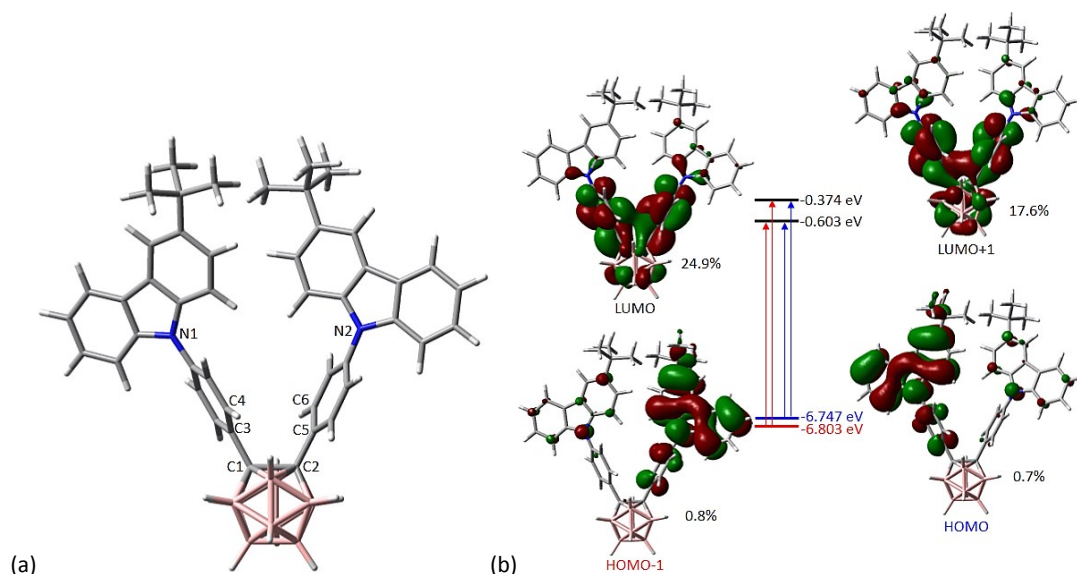

**Fig. S3.1** (a) Optimized ground state structure of **D-1**. Selected bond lengths (Å) and dihedral angles (°): C1–C2 1.683, C1–N1 5.724, C2–N2 5.712, C2–C1–C3–C4 76.26, C1–C2–C5–C6 67.71. The calculated dipole moment is 5.1135 Debye. (b) Calculated electron excitation of **D-1** from the ground state to the lowest excited state. The assignment of the transition is H-1 → L (44.4%), H-1 → L+1 (6.4%), H → L (13.8%) and H → L+1 (35.4%).

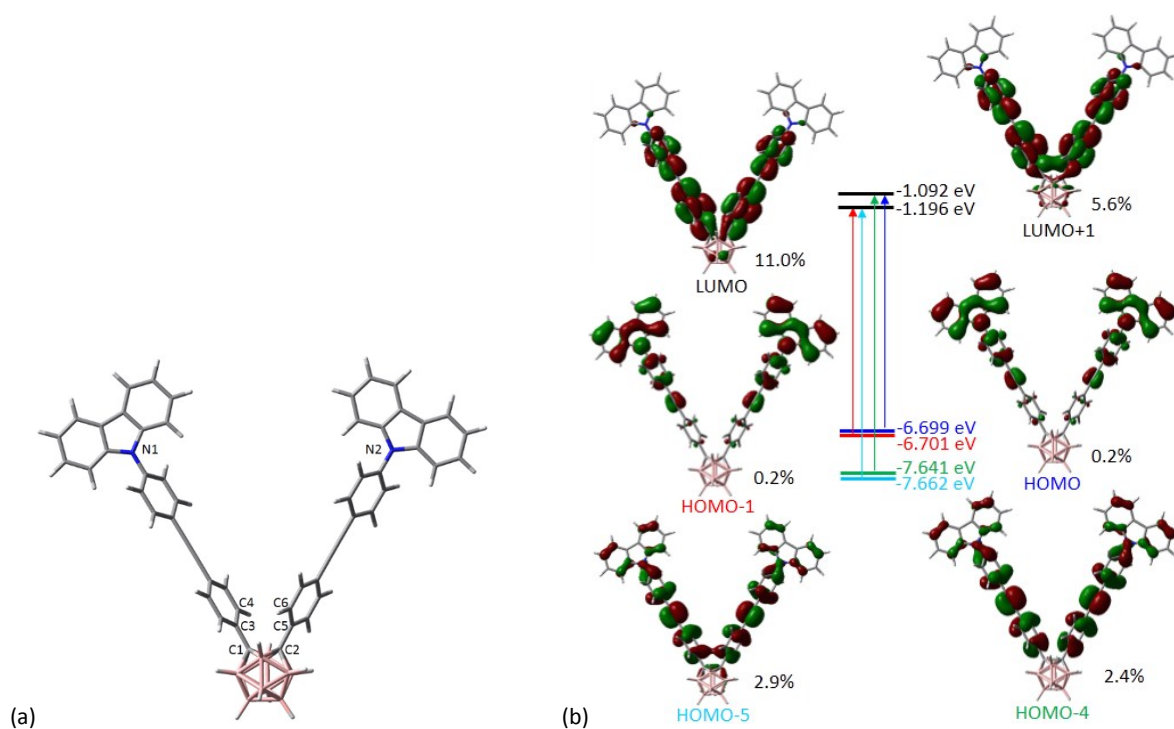

**Fig. S3.2** (a) Optimized ground state structure of **D-2**. Selected bond lengths (Å) and dihedral angles (°): C1–C2 1.683, C1–N1 12.597, C2–N2 12.597, C2–C1–C3–C4 71.34, C1–C2–C5–C6 70.89. The calculated dipole moment is 4.9817 Debye; (b) Calculated electron excitation of **D-2** from its ground state to the lowest excited state. The assignment of the transition is H-5 → L (7.9%), H-4 → L+1 (6.1%), H-1 → L (42.1%) and H → L+1 (38.6%).

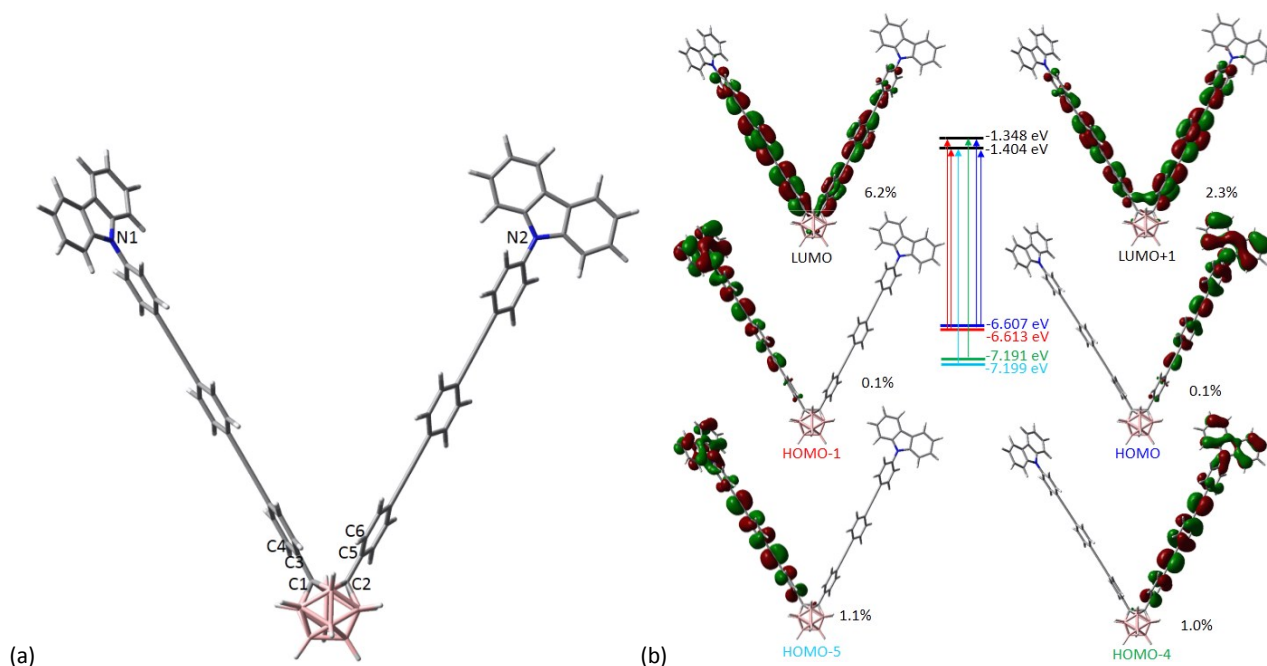

**Fig. S3.3** (a) Optimized ground state structure of **D-3**. Selected bond lengths (Å) and dihedral angles (°): C1–C2 1.690, C1–N1 19.458, C2–N2 19.474, C2–C1–C3–C4 94.67, C1–C2–C5–C6 74.60. The calculated dipole moment is 5.1990 Debye; (b) Calculated electron excitation of **D-3** from the ground state to the lowest excited state. The assignment of the transition is H-5 → L (14.9%), H-4 → L+1 (11.9%), H-1 → L (25.4%), H-1 → L+1 (9.7%), H → L (8.1%) and H → L+1 (20.8%).

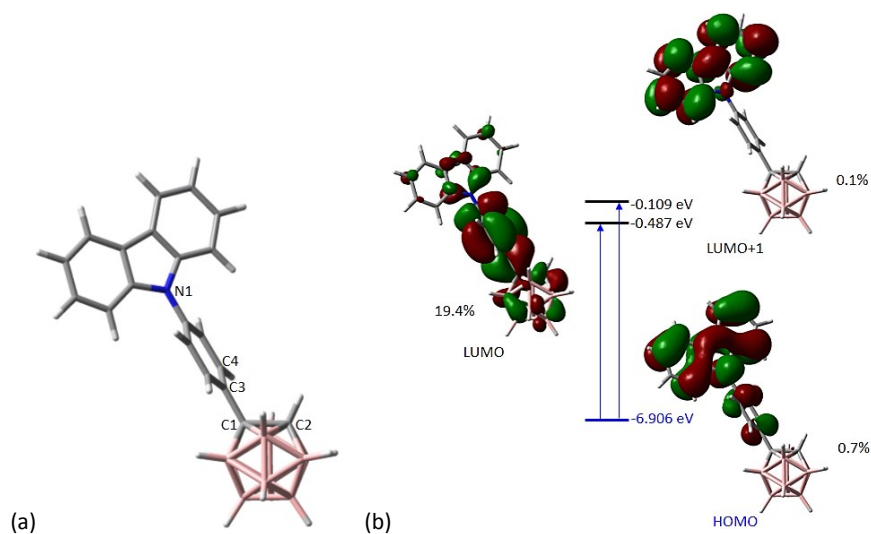

**Fig. S3.4** (a) Optimized ground state structure of **M-1**. Selected bond lengths (Å) and dihedral angles (°): C1–C2 1.643, C1–N1 5.724, C2–C1–C3–C4 81.96. The calculated dipole moment is 4.4254 Debye; (b) Calculated electron excitation of **M-1** from the ground state to the lowest excited state. The assignment of the transition is H → L (93.6%) and H → L+1 (6.4%).



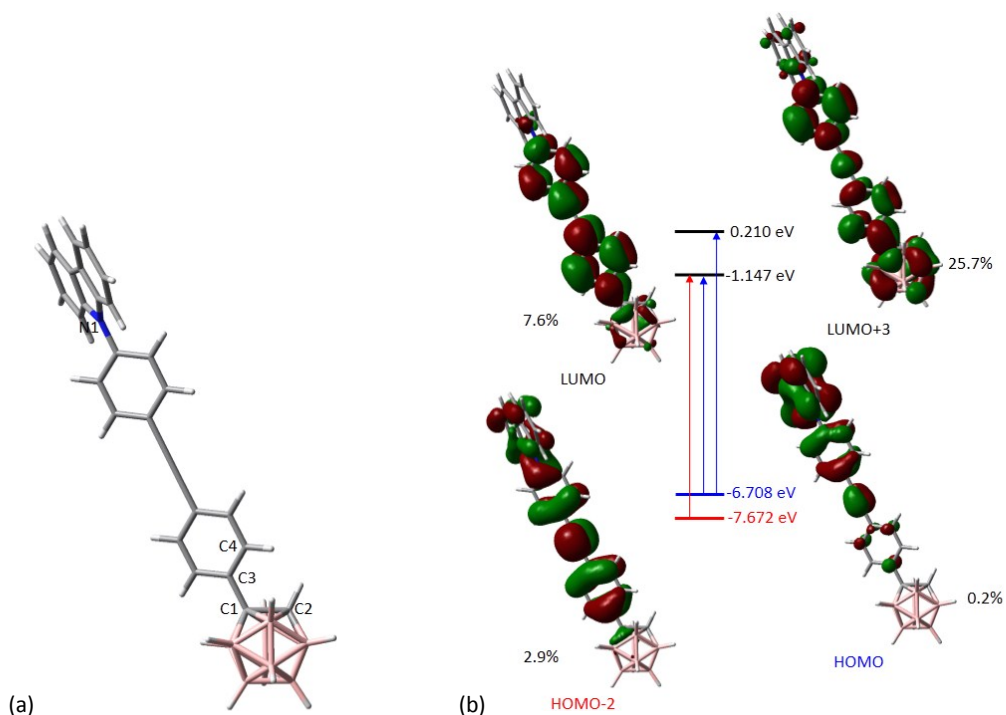

**Fig. S3.5** (a) Optimized ground state structure of **M-2**. Selected bond lengths (Å) and dihedral angles (°): C1–C2 1.627, C1–N1 12.596, C2–C1–C3–C4 29.80. The calculated dipole moment is 4.6412 Debye; (b) Calculated electron excitation of **M-2** from the ground state to the lowest excited state. The assignment of the transition is H-2 → L (8.9%), H → L (82.5%) and H → L+3 (8.6%).

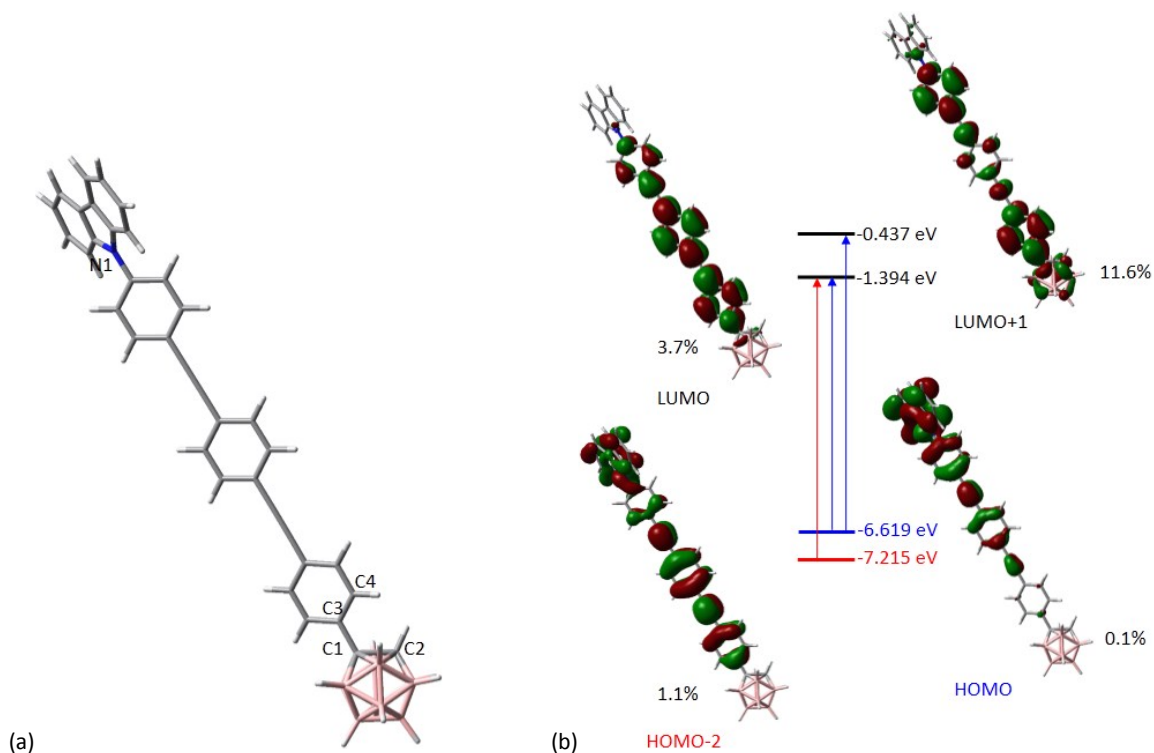

**Fig. S3.6** (a) Optimized ground state structure of **M-3**. Selected bond lengths (Å) and dihedral angles (°): C1–C2 1.627, C1–N1 19.467, C2–C1–C3–C4 27.70. The calculated dipole moment is 4.7159 Debye; (b) Calculated electron excitation of **M-3** from the ground state to the lowest excited state. The assignment of the transition is H-2 → L (25.5%), H → L (62.6%) and H → L+1 (9.4%).

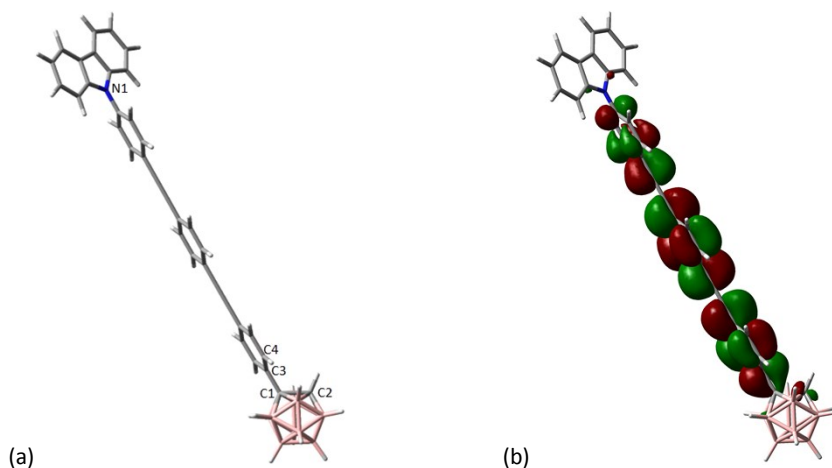

**Fig. S3.7** (a) Optimized structure of **M-3** at its anion state. Selected bond lengths (Å) and dihedral angles (°): C1–C2 1.682, C1–N1 19.500, C2–C1–C3–C4 82.89; (b) The highest semi-occupied molecular orbital (HSOMO) of **M-3** anion.

### 3.2 TD-DFT calculations at the excited state

**Table S4. Electronic transitions of selected *o*-Cb dyads at the LE or CT excited state.**

| Compound   | Basis set          | Emission type | $\lambda_{\text{calc}}$<br>(nm) | $f$     | Assignment (> 5%)                                                                  |
|------------|--------------------|---------------|---------------------------------|---------|------------------------------------------------------------------------------------|
| <b>D-1</b> | <b>6-31g(d, P)</b> | <b>CT</b>     | 444.83                          | 0.2116  | H-1 $\rightarrow$ L (5.4%); H $\rightarrow$ L (91.3%)                              |
| <b>D-2</b> | <b>6-31g(d, P)</b> | <b>CT</b>     | 425.11                          | 0.9057  | H-4 $\rightarrow$ L (26.3%); H $\rightarrow$ L (70.4%)                             |
| <b>D-3</b> | <b>6-31g</b>       | <b>CT</b>     | 431.31 <sup>#</sup>             | 1.0805  | H-6 $\rightarrow$ L (7.5%); H-2 $\rightarrow$ L (44.7%); H $\rightarrow$ L (42.0%) |
| <b>M-2</b> | <b>6-31g(d, P)</b> | <b>LE</b>     | 358.18                          | 1.6526  | H $\rightarrow$ L (91.2%)                                                          |
| <b>M-2</b> | <b>6-31g(d, P)</b> | <b>CT*</b>    | 406.36*                         | 1.2281* | H-2 $\rightarrow$ L (22.1%); H $\rightarrow$ L (73.4%)                             |
| <b>M-3</b> | <b>6-31g(d, P)</b> | <b>LE</b>     | 387.23                          | 2.8522  | H-1 $\rightarrow$ L (9.4%); H $\rightarrow$ L (86.3%)                              |

<sup>#</sup> The calculated excitation energy has been underestimated due to a lower-level basic set, 6-31G.

\* The data were obtained from an estimated structure by merging the geometry of the **M-2** anion with that of the **M-2** cation.

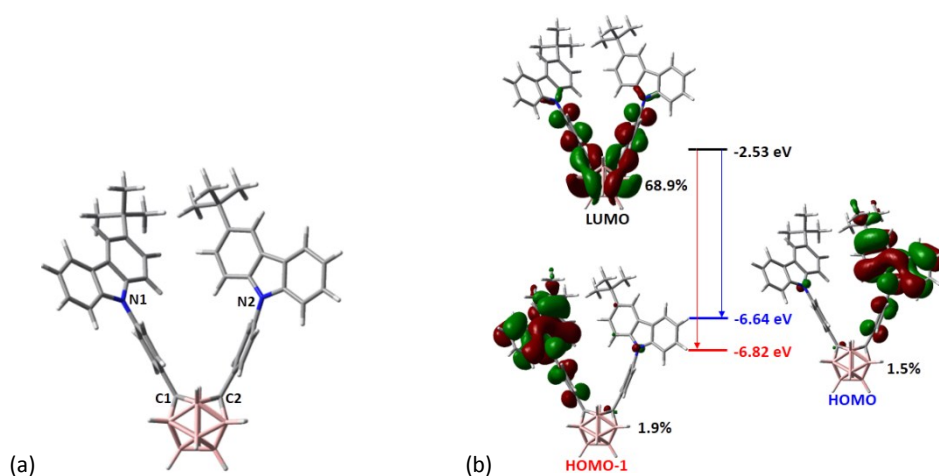

**Fig. S3.7** (a) Optimized structure of the lowest singlet excited state of **D-1**. Selected bond lengths (Å): C1–C2 2.291, C1–N1 5.695, C2–N1 7.131; (b) Calculated electron transition of **D-1** at the lowest singlet excited state. The assignment of the transition is H-1  $\rightarrow$  L (5.4%) and H  $\rightarrow$  L (91.3%).

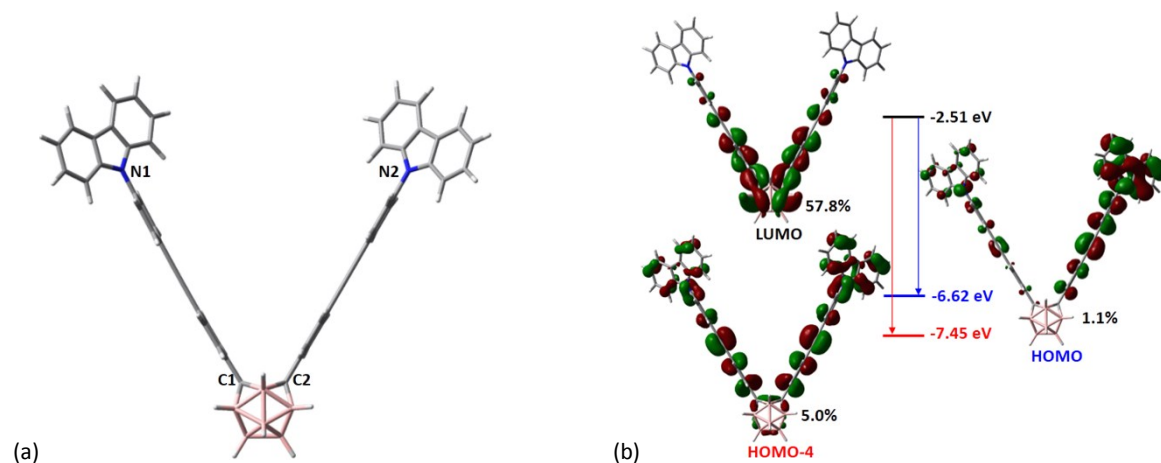

**Fig. S3.8** (a) Optimized structure of the lowest singlet excited state of **D-2**. Selected bond lengths (Å): C1–C2 2.245, C1–N1 12.499, C2–N1 13.722; (b) Calculated electron transition of **D-2** at the lowest singlet excited state. The assignment of the transition is H-4 → L (26.3%) and H → L (70.4%).

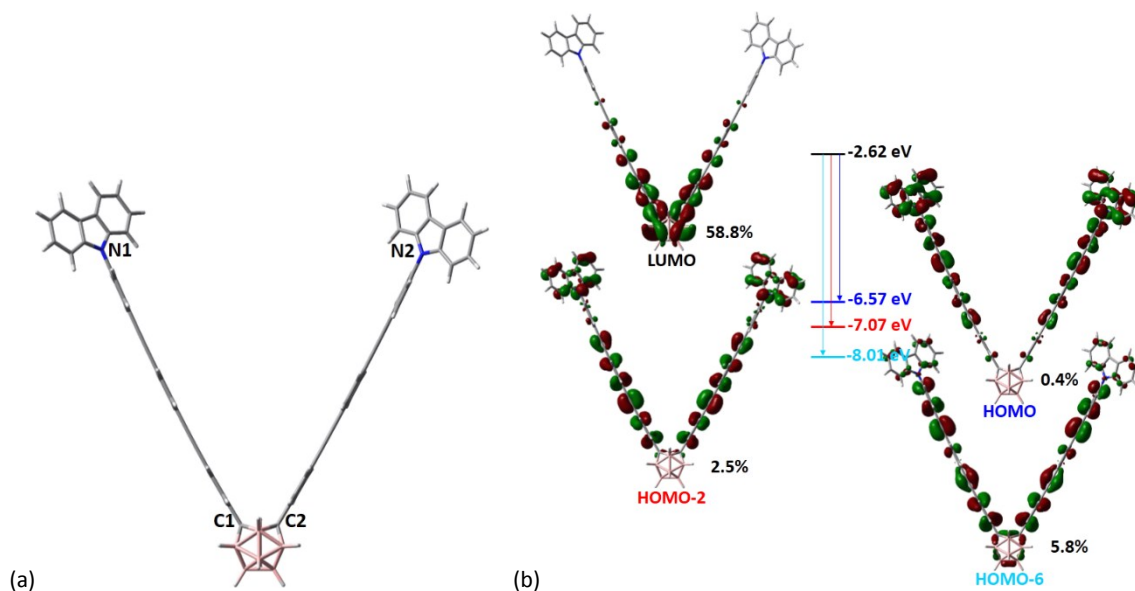

**Fig. S3.9** (a) Optimized structure of the lowest singlet excited state of **D-3**. Selected bond lengths (Å): C1–C2 2.271, C1–N1 19.408, C2–N1 20.528; (b) Calculated electron transition of **D-3** at the lowest singlet excited state. The assignment of the transition is H-6 → L (7.5%), H-2 → L (44.7%) and H → L (42.0%).

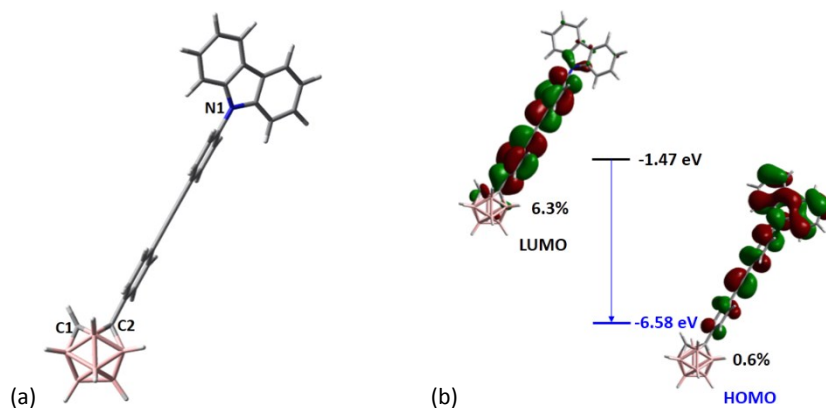

**Fig. S3.10** (a) Optimized structure of the local excited state of **M-2**. Selected bond lengths (Å): C1–C2 1.667, C2–N1 12.566; (b) Calculated electron transition of **M-2** at the local excited state. The assignment of the transition is H → L (91.2%).

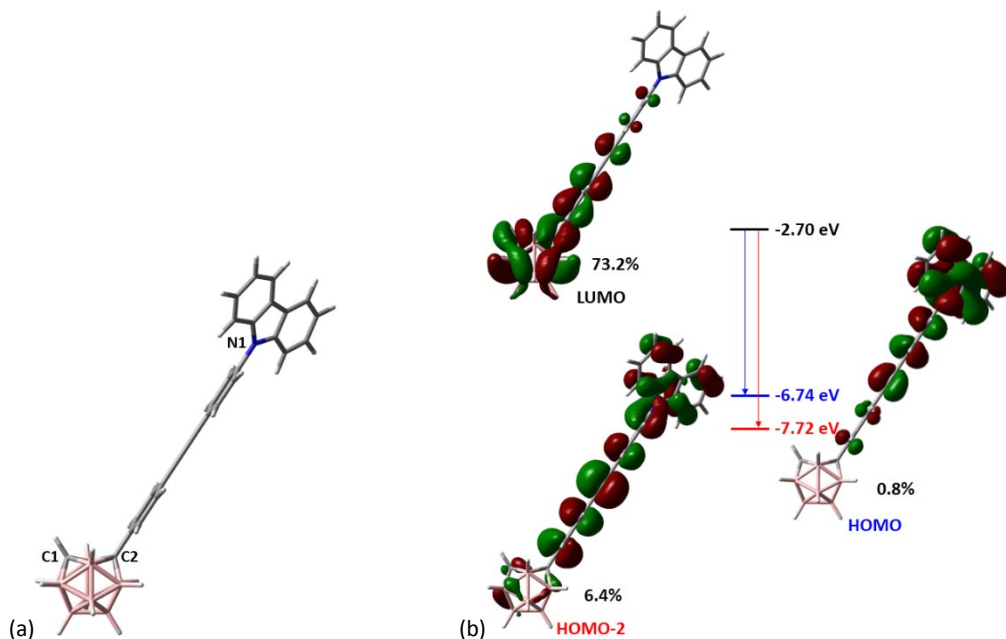

**Fig. S3.11** (a) Estimated charge-transfer excited-state structure of **M-2**. Selected bond lengths (Å): C1–C2 2.321, C2–N1 12.566; (b) Calculated charge-transfer excited-state electronic transition of **M-2**. The assignment of the transition is H-2 → L (22.1%) and H → L (73.4%).

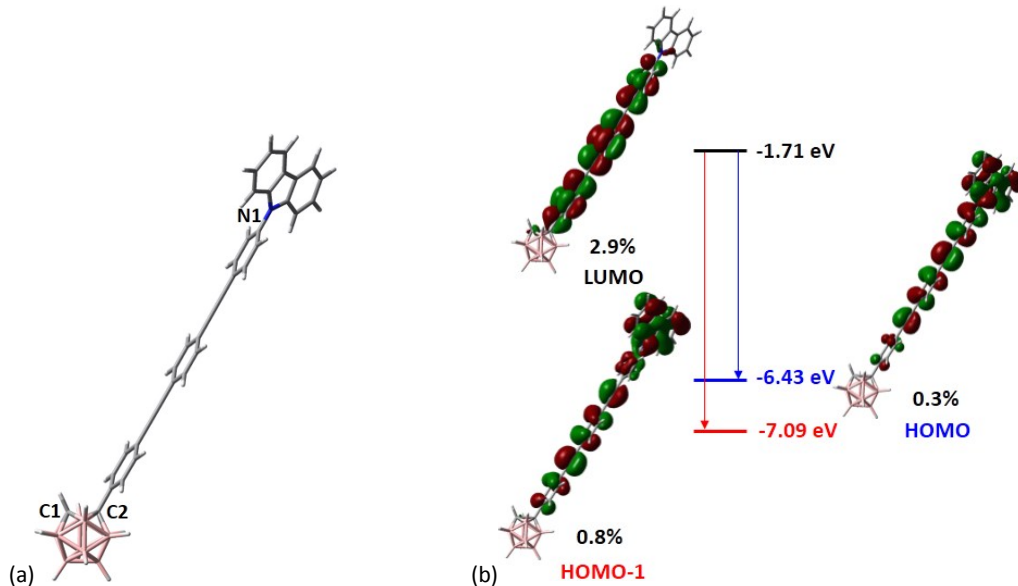

**Fig. S3.12** (a) Optimized local excited-state structure of **M-3**. Selected bond lengths (Å): C1–C2 1.654, C2–N1 19.416; (b) Calculated local excited state electronic transition of **M-3**. The assignment of the transition is H-1 → L (9.4%) and H → L (86.3%).

### 3.3 Cartesian coordinates of *o*-Cb dyads in the ground state

| D-1 | X         | Y         | Z         | D-2 | X         | Y         | Z         |
|-----|-----------|-----------|-----------|-----|-----------|-----------|-----------|
| N   | 3.419328  | -1.213981 | -0.051635 | C   | 2.962311  | 3.342529  | -0.041244 |
| N   | -3.678686 | -1.224357 | -0.23982  | C   | 3.039305  | 4.225388  | 1.044399  |
| B   | -0.33497  | 4.200178  | 1.444361  | C   | 2.359877  | 5.433391  | 1.015566  |
| H   | -0.482446 | 3.421535  | 2.314823  | H   | 2.43212   | 6.104217  | 1.864145  |
| B   | 1.170918  | 5.05063   | 1.101487  | C   | 1.593416  | 5.79912   | -0.09632  |
| H   | 2.105236  | 4.817444  | 1.786671  | C   | 1.515243  | 4.917168  | -1.177986 |
| B   | 1.344895  | 5.132649  | -0.65559  | H   | 0.928878  | 5.171565  | -2.051698 |
| H   | 2.402114  | 4.969326  | -1.15779  | C   | 2.186846  | 3.703772  | -1.150812 |
| B   | -0.052429 | 4.335488  | -1.381349 | H   | 2.120542  | 3.026702  | -1.995065 |
| H   | 0.036451  | 3.651608  | -2.334768 | C   | 0.886023  | 7.12895   | -0.098964 |
| B   | -0.286186 | 5.952313  | 1.54634   | C   | -0.792191 | 7.13855   | 0.027112  |
| H   | -0.380652 | 6.475658  | 2.603538  | B   | 0.149622  | 7.595783  | 1.379764  |
| B   | 0.756209  | 6.541912  | 0.236089  | H   | 0.238335  | 6.865932  | 2.29896   |
| H   | 1.431809  | 7.507337  | 0.347543  | B   | -1.31476  | 8.478562  | 0.948323  |
| B   | 0.00306   | 6.088551  | -1.307683 | H   | -2.274823 | 8.315966  | 1.618198  |
| H   | 0.130413  | 6.709337  | -2.307131 | B   | -1.435646 | 8.472516  | -0.81368  |
| B   | -1.507049 | 5.232315  | -0.950293 | H   | -2.484595 | 8.328164  | -1.337557 |
| H   | -2.451016 | 5.125018  | -1.653134 | B   | -0.050641 | 7.585946  | -1.455099 |
| B   | -1.67822  | 5.149078  | 0.804411  | H   | -0.146409 | 6.850097  | -2.368802 |
| H   | -2.745301 | 5.010144  | 1.292042  | B   | 0.161193  | 9.352106  | 1.387556  |
| B   | -1.005709 | 6.601995  | 0.05771   | H   | 0.244887  | 9.928508  | 2.417764  |
| H   | -1.624506 | 7.610789  | 0.047328  | B   | -0.821603 | 9.904884  | 0.017989  |
| C   | 0.630075  | 3.782443  | 0.094375  | H   | -1.466111 | 10.896692 | 0.057084  |
| C   | -1.042763 | 3.84058   | -0.077891 | B   | -0.043804 | 9.342257  | -1.476186 |
| C   | 1.310307  | 2.438423  | 0.05804   | H   | -0.121381 | 9.911496  | -2.510867 |
| C   | 2.023238  | 2.05444   | -1.082046 | B   | 1.422832  | 8.456522  | -1.03048  |
| H   | 2.063566  | 2.713857  | -1.941818 | H   | 2.380932  | 8.278826  | -1.6993   |
| C   | 2.685886  | 0.835915  | -1.134006 | B   | 1.543887  | 8.46265   | 0.731448  |
| H   | 3.218897  | 0.539674  | -2.031078 | H   | 2.591343  | 8.311889  | 1.256429  |
| C   | 2.673665  | -0.018459 | -0.028778 | B   | 0.944937  | 9.895101  | -0.110814 |
| C   | 1.950963  | 0.349218  | 1.108539  | H   | 1.599889  | 10.879704 | -0.157657 |
| H   | 1.951545  | -0.301514 | 1.976381  | H   | 3.636528  | 3.955717  | 1.908284  |
| C   | 1.273884  | 1.561258  | 1.145633  | C   | 4.788759  | -1.150187 | -0.98162  |
| H   | 0.737497  | 1.829882  | 2.04686   | C   | 5.938508  | -0.434133 | 1.021294  |
| C   | 4.776265  | -1.301004 | -0.388369 | C   | 5.502164  | -2.339069 | -0.96592  |
| C   | 5.647656  | -0.310448 | -0.844347 | H   | 4.070233  | -0.954853 | -1.770137 |
| H   | 5.317864  | 0.710512  | -0.997007 | C   | 6.639979  | -1.629896 | 1.047795  |
| C   | 6.968006  | -0.673132 | -1.078706 | H   | 6.099231  | 0.311077  | 1.792616  |
| H   | 7.663578  | 0.07932   | -1.435913 | C   | 6.427987  | -2.586761 | 0.051437  |
| C   | 7.421344  | -1.981354 | -0.861428 | H   | 5.36073   | -3.080348 | -1.745578 |
| H   | 8.458542  | -2.228501 | -1.060152 | H   | 7.345987  | -1.840267 | 1.844574  |

|   |           |           |           |   |           |           |           |
|---|-----------|-----------|-----------|---|-----------|-----------|-----------|
| C | 6.555976  | -2.95426  | -0.383179 | C | 8.527099  | -3.934636 | 0.192371  |
| H | 6.906781  | -3.964404 | -0.194226 | C | 6.583228  | -5.076463 | -0.026301 |
| C | 5.225582  | -2.613423 | -0.137233 | C | 9.505711  | -2.943282 | 0.27512   |
| C | 4.097344  | -3.350413 | 0.39442   | C | 8.859333  | -5.305692 | 0.169262  |
| C | 3.947804  | -4.657984 | 0.845212  | C | 5.240994  | -5.446962 | -0.117682 |
| H | 4.805466  | -5.325551 | 0.828341  | C | 7.61552   | -6.036209 | 0.032438  |
| C | 2.717817  | -5.104011 | 1.331274  | C | 10.828757 | -3.354812 | 0.360246  |
| C | 1.633839  | -4.20675  | 1.308909  | H | 9.244784  | -1.890751 | 0.262363  |
| H | 0.65575   | -4.533389 | 1.647259  | C | 10.197822 | -5.692516 | 0.256368  |
| C | 1.754333  | -2.89077  | 0.866485  | C | 4.953578  | -6.803937 | -0.174574 |
| H | 0.890192  | -2.234747 | 0.869428  | H | 4.45101   | -4.704054 | -0.132785 |
| C | 3.005862  | -2.459155 | 0.433807  | C | 7.299093  | -7.394754 | -0.027251 |
| C | -1.774174 | 2.528158  | -0.162072 | C | 11.176084 | -4.713907 | 0.356185  |
| C | -1.627514 | 1.673872  | -1.257594 | H | 11.610685 | -2.605312 | 0.427803  |
| H | -1.005233 | 1.958542  | -2.096101 | H | 10.466412 | -6.744535 | 0.240037  |
| C | -2.276399 | 0.448777  | -1.290611 | C | 5.968411  | -7.77141  | -0.135714 |
| H | -2.170797 | -0.206604 | -2.148608 | H | 3.91817   | -7.120975 | -0.246357 |
| C | -3.076535 | 0.048091  | -0.219726 | H | 8.084978  | -8.142812 | 0.017702  |
| C | -3.246295 | 0.902171  | 0.870736  | H | 12.220302 | -4.998963 | 0.425199  |
| H | -3.858495 | 0.585092  | 1.708577  | H | 5.706762  | -8.822935 | -0.183712 |
| C | -2.600852 | 2.13094   | 0.893187  | N | 7.14325   | -3.802595 | 0.072429  |
| H | -2.725169 | 2.779443  | 1.753343  | C | 5.000463  | -0.18067  | 0.009641  |
| C | -3.008078 | -2.416951 | -0.514865 | C | 3.66877   | 2.100011  | -0.021143 |
| C | -1.656755 | -2.642386 | -0.760562 | C | 4.275345  | 1.051421  | -0.009537 |
| H | -0.939584 | -1.828355 | -0.786573 | C | -1.515829 | 5.817572  | 0.036589  |
| C | -1.245798 | -3.95357  | -0.972779 | C | -2.281946 | 5.447807  | -1.074164 |
| H | -0.190873 | -4.124522 | -1.15545  | C | -1.455441 | 4.949323  | 1.13042   |
| C | -2.139042 | -5.0406   | -0.94876  | C | -2.978282 | 4.249142  | -1.090208 |
| C | -3.485443 | -4.78612  | -0.682586 | H | -2.341023 | 6.10837   | -1.931786 |
| H | -4.200516 | -5.603944 | -0.643643 | C | -2.144232 | 3.745461  | 1.116283  |
| C | -3.926056 | -3.484166 | -0.456166 | H | -0.870472 | 5.207665  | 2.003878  |
| C | -5.21595  | -2.907433 | -0.126874 | C | -2.919519 | 3.380319  | 0.007861  |
| C | -6.490882 | -3.44533  | 0.053958  | H | -3.575285 | 3.976469  | -1.953306 |
| H | -6.653304 | -4.514696 | -0.042183 | H | -2.09243  | 3.079515  | 1.970325  |
| C | -7.544898 | -2.593084 | 0.351082  | C | -3.644481 | 2.148334  | 0.002859  |
| H | -8.541289 | -2.996518 | 0.495207  | C | -4.266051 | 1.108489  | 0.006648  |
| C | -7.336429 | -1.210557 | 0.458132  | C | -5.006724 | -0.114485 | 0.005547  |
| H | -8.176942 | -0.56084  | 0.679659  | C | -5.947712 | -0.371507 | -1.002429 |
| C | -6.078156 | -0.649146 | 0.282857  | C | -4.806063 | -1.072167 | 1.010524  |
| H | -5.927398 | 0.422741  | 0.351138  | C | -6.661797 | -1.560095 | -1.012965 |
| C | -5.021277 | -1.515259 | 0.001988  | H | -6.100563 | 0.3649    | -1.783731 |
| C | -1.679735 | -6.479963 | -1.201378 | C | -5.532083 | -2.253418 | 1.010814  |
| C | -2.064264 | -7.357803 | 0.00159   | H | -4.085597 | -0.873798 | 1.796512  |
| H | -3.149206 | -7.412338 | 0.129342  | C | -6.45961  | -2.505718 | -0.003907 |

|   |           |           |           |   |            |           |           |
|---|-----------|-----------|-----------|---|------------|-----------|-----------|
| H | -1.692362 | -8.378472 | -0.137285 | H | -7.369602  | -1.773861 | -1.807242 |
| H | -1.640599 | -6.957585 | 0.927446  | H | -5.398456  | -2.985494 | 1.800458  |
| C | -0.163685 | -6.567961 | -1.406167 | C | -8.569544  | -3.839149 | -0.130343 |
| H | 0.153407  | -6.023448 | -2.301315 | C | -6.634684  | -4.992152 | 0.109184  |
| H | 0.386936  | -6.159748 | -0.551086 | C | -9.540914  | -2.842115 | -0.229683 |
| H | 0.129943  | -7.615263 | -1.530867 | C | -8.911892  | -5.207247 | -0.087851 |
| C | -2.370102 | -7.023191 | -2.463416 | C | -5.295469  | -5.37147  | 0.208989  |
| H | -3.458905 | -7.015312 | -2.357597 | C | -7.673926  | -5.944913 | 0.062605  |
| H | -2.111776 | -6.417163 | -3.336891 | C | -10.866737 | -3.245408 | -0.311779 |
| H | -2.056563 | -8.055338 | -2.654157 | H | -9.272534  | -1.791368 | -0.231582 |
| C | 2.613252  | -6.524107 | 1.900494  | C | -10.252889 | -5.585735 | -0.172316 |
| C | 2.99491   | -7.552231 | 0.823166  | C | -5.018437  | -6.729517 | 0.28736   |
| H | 2.939738  | -8.565875 | 1.23426   | H | -4.499829  | -4.634507 | 0.214168  |
| H | 2.31664   | -7.491514 | -0.033146 | C | -7.367977  | -7.304719 | 0.143856  |
| H | 4.013651  | -7.394399 | 0.457815  | C | -11.223883 | -4.60171  | -0.288723 |
| C | 1.202795  | -6.84771  | 2.40007   | H | -11.643028 | -2.491341 | -0.39202  |
| H | 0.469673  | -6.805736 | 1.589178  | H | -10.529085 | -6.635448 | -0.141268 |
| H | 1.184086  | -7.86172  | 2.810725  | C | -6.040464  | -7.689774 | 0.261228  |
| H | 0.886467  | -6.159688 | 3.190391  | H | -3.985618  | -7.053193 | 0.366352  |
| C | 3.58136   | -6.655485 | 3.089481  | H | -8.159497  | -8.04736  | 0.108934  |
| H | 4.617644  | -6.483251 | 2.785265  | H | -12.269982 | -4.880214 | -0.355986 |
| H | 3.334948  | -5.930206 | 3.87089   | H | -5.787023  | -8.742379 | 0.326323  |
| H | 3.518152  | -7.661008 | 3.519022  | N | -7.184941  | -3.715678 | -0.009469 |

| <b>D-3</b> | X         | Y         | Z         | <b>M-1</b> | X         | Y         | Z         |
|------------|-----------|-----------|-----------|------------|-----------|-----------|-----------|
| C          | -0.558817 | 0.03592   | -0.149943 | C          | 1.077255  | -0.009116 | 0.034446  |
| C          | -0.430655 | -0.193282 | 1.226725  | C          | 0.36766   | -0.830951 | -0.843282 |
| C          | 0.791159  | -0.016169 | 1.857032  | C          | -1.019866 | -0.834855 | -0.824896 |
| H          | 0.87089   | -0.19992  | 2.922382  | H          | -1.554224 | -1.488167 | -1.505044 |
| C          | 1.9189    | 0.387625  | 1.134282  | C          | -1.729861 | -0.004821 | 0.048534  |
| C          | 1.793976  | 0.600291  | -0.241301 | C          | -1.010517 | 0.80245   | 0.933836  |
| H          | 2.653601  | 0.894958  | -0.829519 | H          | -1.530208 | 1.420641  | 1.654919  |
| C          | 0.572     | 0.43122   | -0.876114 | C          | 0.378214  | 0.799879  | 0.931286  |
| H          | 0.4846    | 0.60271   | -1.943174 | H          | 0.929342  | 1.408233  | 1.640709  |
| C          | 3.232314  | 0.567404  | 1.848594  | C          | -3.237983 | -0.039731 | 0.059423  |
| C          | 3.784988  | 2.139104  | 2.130229  | C          | -4.085605 | 1.130481  | -0.723497 |
| B          | 3.150817  | 1.221575  | 3.429746  | B          | -4.009989 | -0.40721  | -1.435905 |
| H          | 2.085455  | 1.502508  | 3.846801  | H          | -3.329635 | -0.534082 | -2.390101 |
| B          | 4.590569  | 2.223244  | 3.628505  | B          | -5.499627 | 0.542766  | -1.442033 |
| H          | 4.479924  | 3.234555  | 4.230792  | H          | -5.833624 | 1.018444  | -2.47059  |
| B          | 5.485136  | 2.179248  | 2.104196  | B          | -5.545741 | 1.500846  | 0.043001  |
| H          | 5.982769  | 3.160108  | 1.67102   | H          | -5.910781 | 2.624019  | 0.019264  |
| B          | 4.590118  | 1.148488  | 0.986409  | B          | -4.086049 | 1.145854  | 0.972988  |
| H          | 4.493219  | 1.385522  | -0.16104  | H          | -3.480018 | 1.994692  | 1.519123  |

|   |            |           |           |   |           |           |           |
|---|------------|-----------|-----------|---|-----------|-----------|-----------|
| B | 4.544005   | 0.581089  | 4.28797   | B | -5.530241 | -1.172265 | -0.997565 |
| H | 4.476336   | 0.395048  | 5.454765  | H | -6.004522 | -1.984343 | -1.715649 |
| B | 6.002663   | 1.16833   | 3.463292  | B | -6.489167 | 0.00868   | -0.075626 |
| H | 7.004248   | 1.411302  | 4.045211  | H | -7.670453 | 0.045551  | -0.135519 |
| B | 6.000215   | 0.509611  | 1.814194  | B | -5.607801 | 0.387603  | 1.421999  |
| H | 6.981333   | 0.277574  | 1.194701  | H | -6.136473 | 0.697732  | 2.434194  |
| B | 4.551066   | -0.492362 | 1.627708  | B | -4.110475 | -0.561683 | 1.426644  |
| H | 4.393454   | -1.379393 | 0.862865  | H | -3.475224 | -0.897862 | 2.364893  |
| B | 3.658445   | -0.445332 | 3.150259  | B | -4.065791 | -1.521389 | -0.063198 |
| H | 2.902442   | -1.310833 | 3.425881  | H | -3.405339 | -2.50038  | -0.111145 |
| B | 5.425681   | -0.480231 | 3.169121  | B | -5.602968 | -1.267738 | 0.776937  |
| H | 6.002117   | -1.445917 | 3.538271  | H | -6.136334 | -2.163518 | 1.337024  |
| H | -1.298253  | -0.506409 | 1.796756  | H | 0.909419  | -1.453895 | -1.547166 |
| C | -4.344655  | 0.069369  | -3.302943 | C | 3.294591  | 1.134324  | -0.038295 |
| C | -5.22152   | -1.055046 | -1.346715 | C | 3.308126  | -1.130767 | 0.052018  |
| C | -5.569167  | -0.072501 | -3.933758 | C | 2.928778  | 2.477674  | -0.130242 |
| H | -3.521124  | 0.561888  | -3.808263 | C | 4.646766  | 0.732684  | -0.047323 |
| C | -6.445588  | -1.198473 | -1.978339 | C | 2.959095  | -2.477551 | 0.158471  |
| H | -5.075576  | -1.434442 | -0.341289 | C | 4.655389  | -0.715055 | 0.013521  |
| C | -6.636125  | -0.708083 | -3.279505 | C | 3.948863  | 3.416724  | -0.203937 |
| H | -5.715494  | 0.30749   | -4.938851 | H | 1.887677  | 2.779977  | -0.154293 |
| H | -7.269132  | -1.69075  | -1.472895 | C | 5.653314  | 1.697015  | -0.122337 |
| C | -7.900584  | -0.852374 | -3.92914  | C | 3.990814  | -3.405828 | 0.195989  |
| C | -8.973473  | -0.972563 | -4.479841 | H | 1.922863  | -2.790544 | 0.222658  |
| C | -10.237712 | -1.111709 | -5.132264 | C | 5.673908  | -1.668896 | 0.053048  |
| C | -11.296641 | -1.781234 | -4.501192 | C | 5.298535  | 3.036205  | -0.195189 |
| C | -10.437784 | -0.579307 | -6.414664 | H | 3.69247   | 4.468849  | -0.274368 |
| C | -12.525623 | -1.906811 | -5.131098 | H | 6.697501  | 1.399265  | -0.129655 |
| H | -11.149074 | -2.187933 | -3.506712 | C | 5.335347  | -3.011488 | 0.138231  |
| C | -11.660064 | -0.72127  | -7.053554 | H | 3.74793   | -4.460328 | 0.277313  |
| H | -9.619251  | -0.068038 | -6.909397 | H | 6.71463   | -1.360556 | 0.023855  |
| C | -12.712145 | -1.381704 | -6.41277  | H | 6.069107  | 3.79721   | -0.254212 |
| H | -13.354854 | -2.398565 | -4.633072 | H | 6.115296  | -3.764607 | 0.169509  |
| H | -11.807747 | -0.335453 | -8.056951 | N | 2.485985  | -0.002405 | 0.020849  |
| C | -14.665749 | -2.711322 | -7.221232 | H | -3.478967 | 1.89292   | -1.196711 |
| C | -14.680642 | -0.489791 | -7.664211 |   |           |           |           |
| C | -14.322032 | -4.005953 | -6.828872 |   |           |           |           |
| C | -15.853161 | -2.444941 | -7.935029 |   |           |           |           |
| C | -14.395477 | 0.875218  | -7.72556  |   |           |           |           |
| C | -15.863542 | -1.024247 | -8.216922 |   |           |           |           |
| C | -15.207515 | -5.027606 | -7.145    |   |           |           |           |
| H | -13.393116 | -4.209752 | -6.307937 |   |           |           |           |
| C | -16.726818 | -3.490253 | -8.239522 |   |           |           |           |
| C | -15.309134 | 1.69218   | -8.377732 |   |           |           |           |



|   |            |           |           |
|---|------------|-----------|-----------|
| H | -13.499676 | 1.285628  | -7.272947 |
| C | -16.765926 | -0.180823 | -8.86721  |
| C | -16.40123  | -4.77731  | -7.837588 |
| H | -14.965118 | -6.044055 | -6.85197  |
| H | -17.643816 | -3.295516 | -8.787506 |
| C | -16.480585 | 1.174139  | -8.949398 |
| H | -15.111446 | 2.757341  | -8.441508 |
| H | -17.679295 | -0.582037 | -9.295955 |
| H | -17.069618 | -5.60051  | -8.06562  |
| H | -17.170754 | 1.842684  | -9.452598 |
| N | -13.958958 | -1.519121 | -7.059197 |
| C | -4.155335  | -0.418958 | -2.001068 |
| C | -1.8206    | -0.130813 | -0.800673 |
| C | -2.89211   | -0.266101 | -1.350101 |
| C | 2.977574   | 3.305785  | 1.627223  |
| C | 3.177466   | 3.81335   | 0.339505  |
| C | 2.057903   | 3.943605  | 2.464983  |
| C | 2.458626   | 4.910458  | -0.108988 |
| H | 3.912863   | 3.361623  | -0.315258 |
| C | 1.338243   | 5.043973  | 2.02283   |
| H | 1.912708   | 3.588778  | 3.478357  |
| C | 1.525006   | 5.539385  | 0.725674  |
| H | 2.621744   | 5.298575  | -1.108262 |
| H | 0.629375   | 5.532022  | 2.682387  |
| C | 0.798842   | 6.677718  | 0.25695   |
| C | 0.206961   | 7.647247  | -0.164746 |
| C | -0.469304  | 8.79289   | -0.686563 |
| C | -0.31774   | 9.140971  | -2.037715 |
| C | -1.280741  | 9.586887  | 0.138218  |
| C | -0.957716  | 10.256164 | -2.550588 |
| H | 0.308975   | 8.526174  | -2.674458 |
| C | -1.920193  | 10.703352 | -0.374796 |
| H | -1.398511  | 9.318727  | 1.182424  |
| C | -1.765952  | 11.053644 | -1.724985 |
| H | -0.838849  | 10.525826 | -3.594244 |
| H | -2.544842  | 11.319236 | 0.262821  |
| C | -2.417151  | 12.209383 | -2.25542  |
| C | -2.96172   | 13.191364 | -2.711074 |
| C | -3.598637  | 14.351109 | -3.251671 |
| C | -3.436063  | 14.686509 | -4.603893 |
| C | -4.393334  | 15.172317 | -2.437906 |
| C | -4.058195  | 15.807868 | -5.131407 |
| H | -2.828578  | 14.04982  | -5.237764 |
| C | -5.000121  | 16.304576 | -2.959582 |

|   |            |           |           |
|---|------------|-----------|-----------|
| H | -4.515143  | 14.921319 | -1.389878 |
| C | -4.839132  | 16.62573  | -4.310097 |
| H | -3.957254  | 16.054087 | -6.183461 |
| H | -5.59202   | 16.95705  | -2.32599  |
| C | -4.831677  | 18.771404 | -5.58865  |
| C | -6.80523   | 18.118289 | -4.689264 |
| C | -3.490603  | 18.88867  | -5.956859 |
| C | -5.779253  | 19.763417 | -5.918423 |
| C | -7.831923  | 17.415321 | -4.056785 |
| C | -7.041848  | 19.345061 | -5.344292 |
| C | -3.12221   | 20.010465 | -6.687552 |
| H | -2.760101  | 18.138967 | -5.673403 |
| C | -5.382588  | 20.881475 | -6.654328 |
| C | -9.099054  | 17.981975 | -4.069961 |
| H | -7.65049   | 16.457729 | -3.581379 |
| C | -8.325599  | 19.893298 | -5.342613 |
| C | -4.055162  | 20.996496 | -7.040065 |
| H | -2.085819  | 20.126265 | -6.987914 |
| H | -6.104049  | 21.650478 | -6.913996 |
| C | -9.347798  | 19.210513 | -4.699653 |
| H | -9.915482  | 17.458153 | -3.583362 |
| H | -8.518237  | 20.838254 | -5.841584 |
| H | -3.732105  | 21.858529 | -7.613649 |
| H | -10.350335 | 19.624243 | -4.687319 |
| N | -5.461796  | 17.774763 | -4.842701 |

| <b>M-2</b> | X        | Y         | Z         | <b>M-3</b> | X         | Y         | Z         |
|------------|----------|-----------|-----------|------------|-----------|-----------|-----------|
| C          | 2.48363  | -0.015826 | 0.105074  | C          | 6.001831  | -0.084249 | -0.032793 |
| C          | 3.19567  | 0.858412  | -0.72678  | C          | 6.753921  | -1.062156 | 0.631291  |
| C          | 4.582212 | 0.856905  | -0.724755 | C          | 8.140319  | -1.015562 | 0.612952  |
| H          | 5.104913 | 1.565326  | -1.359212 | H          | 8.69363   | -1.804974 | 1.111264  |
| C          | 5.29484  | -0.021137 | 0.096829  | C          | 8.81151   | 0.011982  | -0.056035 |
| C          | 4.586742 | -0.886189 | 0.93394   | C          | 8.062921  | 0.980348  | -0.728885 |
| H          | 5.121619 | -1.564932 | 1.587004  | H          | 8.565659  | 1.774973  | -1.265871 |
| C          | 3.199447 | -0.883766 | 0.940334  | C          | 6.677142  | 0.933846  | -0.719671 |
| H          | 2.657416 | -1.558676 | 1.593461  | H          | 6.104644  | 1.69061   | -1.244299 |
| C          | 6.801314 | -0.034748 | 0.096445  | C          | 10.315903 | 0.080149  | -0.079195 |
| C          | 7.557857 | 0.377347  | -1.283781 | C          | 11.131671 | -0.576437 | 1.166391  |
| B          | 7.575924 | 1.498118  | -0.00013  | B          | 11.144422 | -1.408292 | -0.320621 |
| H          | 6.879804 | 2.446879  | -0.076672 | H          | 10.480245 | -2.377733 | -0.42303  |
| B          | 8.994714 | 1.222384  | -1.017979 | B          | 12.587834 | -1.291084 | 0.693725  |
| H          | 9.286574 | 2.070925  | -1.786625 | H          | 12.933383 | -2.266902 | 1.263176  |
| B          | 8.995896 | -0.474646 | -1.531102 | B          | 12.548115 | 0.26313   | 1.547053  |
| H          | 9.286077 | -0.752574 | -2.642012 | H          | 12.865622 | 0.316622  | 2.683661  |

|   |            |           |           |   |            |           |           |
|---|------------|-----------|-----------|---|------------|-----------|-----------|
| B | 7.568898   | -1.265625 | -0.839148 | B | 11.072261  | 1.121028  | 1.070448  |
| H | 6.859572   | -2.001955 | -1.427569 | H | 10.358429  | 1.691684  | 1.816335  |
| B | 9.151007   | 1.26953   | 0.747184  | B | 12.683943  | -0.968492 | -1.045787 |
| H | 9.673575   | 2.178663  | 1.294945  | H | 13.217696  | -1.724654 | -1.782972 |
| B | 10.034901  | 0.048619  | -0.198134 | B | 13.559134  | 0.06698   | 0.10793   |
| H | 11.210683  | 0.086677  | -0.32662  | H | 14.739058  | 0.049417  | 0.195909  |
| B | 9.146538   | -1.489392 | -0.090363 | B | 12.616561  | 1.55745   | 0.343551  |
| H | 9.66514    | -2.55224  | -0.131495 | H | 13.099689  | 2.608817  | 0.591066  |
| B | 7.720236   | -1.210748 | 0.919862  | B | 11.167907  | 1.436308  | -0.665353 |
| H | 7.160092   | -2.034968 | 1.552354  | H | 10.56095   | 2.351243  | -1.098622 |
| B | 7.717831   | 0.481763  | 1.43945   | B | 11.204486  | -0.112556 | -1.522347 |
| H | 7.113076   | 0.8038    | 2.402441  | H | 10.577891  | -0.252498 | -2.514795 |
| B | 9.243723   | -0.409159 | 1.320654  | B | 12.701983  | 0.794929  | -1.261718 |
| H | 9.840659   | -0.709978 | 2.297287  | H | 13.255807  | 1.312958  | -2.170335 |
| H | 6.909293   | 0.615802  | -2.116796 | H | 10.522155  | -1.007769 | 1.949762  |
| H | 2.651544   | 1.542167  | -1.368793 | H | 6.242476   | -1.862391 | 1.154455  |
| C | -2.311877  | -0.872537 | 0.902465  | C | 1.227642   | 0.78434   | -0.806657 |
| C | -2.283337  | 0.859872  | -0.783724 | C | 1.217813   | -1.036244 | 0.788889  |
| C | -3.698317  | -0.863118 | 0.889483  | C | -0.156764  | 0.794072  | -0.804449 |
| H | -1.775988  | -1.538757 | 1.569778  | H | 1.78085    | 1.483787  | -1.42387  |
| C | -3.669416  | 0.856507  | -0.811676 | C | -0.167045  | -1.025774 | 0.791695  |
| H | -1.724895  | 1.523425  | -1.434987 | H | 1.762651   | -1.743491 | 1.40466   |
| C | -4.384064  | -0.002127 | 0.028307  | C | -0.872507  | -0.110044 | -0.004211 |
| H | -4.263156  | -1.50931  | 1.553494  | H | -0.701968  | 1.501337  | -1.419753 |
| H | -4.211251  | 1.504814  | -1.492598 | H | -0.720134  | -1.724654 | 1.40956   |
| C | -6.609623  | -1.124988 | -0.125089 | C | -2.301124  | -0.094273 | -0.000116 |
| C | -6.609446  | 1.129314  | 0.098172  | C | -3.51274   | -0.073926 | 0.00106   |
| C | -6.250577  | -2.462888 | -0.293973 | C | -4.941872  | -0.048554 | 0.002885  |
| C | -7.959699  | -0.715443 | -0.116042 | C | -5.638409  | 0.869791  | -0.796466 |
| C | -6.252229  | 2.465875  | 0.281301  | C | -5.668542  | -0.941238 | 0.804562  |
| C | -7.959617  | 0.725933  | 0.028908  | C | -7.024774  | 0.888868  | -0.801966 |
| C | -7.275661  | -3.389748 | -0.426685 | H | -5.07954   | 1.555788  | -1.423634 |
| H | -5.210737  | -2.768015 | -0.332706 | C | -7.05468   | -0.910413 | 0.814362  |
| C | -8.971468  | -1.667998 | -0.251687 | H | -5.132999  | -1.647267 | 1.429833  |
| C | -7.277943  | 3.397599  | 0.366351  | C | -7.739703  | 0.001744  | 0.007255  |
| H | -5.213722  | 2.766112  | 0.366329  | H | -7.567048  | 1.578388  | -1.44086  |
| C | -8.972008  | 1.683181  | 0.117932  | H | -7.619704  | -1.580082 | 1.454612  |
| C | -8.623503  | -3.002516 | -0.400791 | C | -9.94642   | 1.159889  | 0.179369  |
| H | -7.025231  | -4.437351 | -0.558983 | C | -9.984765  | -1.078326 | -0.165176 |
| H | -10.014001 | -1.364308 | -0.246252 | C | -9.565424  | 2.479739  | 0.425663  |
| C | -8.624946  | 3.016358  | 0.280468  | C | -11.303715 | 0.779528  | 0.116845  |
| H | -7.028915  | 4.444264  | 0.508394  | C | -9.648487  | -2.4102   | -0.411931 |
| H | -10.014663 | 1.384323  | 0.066329  | C | -11.328234 | -0.651667 | -0.105426 |
| H | -9.397748  | -3.754555 | -0.507187 | C | -10.575259 | 3.419587  | 0.582201  |

|   |           |           |          |   |            |           |           |
|---|-----------|-----------|----------|---|------------|-----------|-----------|
| H | -9.399839 | 3.77199   | 0.351424 | H | -8.520817  | 2.760115  | 0.503711  |
| N | -5.794518 | 0.000294  | 0.005454 | C | -12.299701 | 1.744632  | 0.278333  |
| C | -1.586488 | -0.008086 | 0.069572 | C | -10.689462 | -3.314564 | -0.572032 |
| C | 1.054363  | -0.016055 | 0.100674 | H | -8.613887  | -2.726113 | -0.487493 |
| C | -0.15696  | -0.012437 | 0.088    | C | -12.356358 | -1.581935 | -0.26987  |
|   |           |           |          | C | -11.929377 | 3.062138  | 0.504538  |
|   |           |           |          | H | -10.307909 | 4.453691  | 0.774384  |
|   |           |           |          | H | -13.347597 | 1.463652  | 0.232345  |
|   |           |           |          | C | -12.030789 | -2.911124 | -0.496705 |
|   |           |           |          | H | -10.45713  | -4.356964 | -0.764834 |
|   |           |           |          | H | -13.394074 | -1.26517  | -0.22595  |
|   |           |           |          | H | -12.691255 | 3.823651  | 0.631003  |
|   |           |           |          | H | -12.817644 | -3.646359 | -0.625601 |
|   |           |           |          | N | -9.150711  | 0.026556  | 0.008449  |
|   |           |           |          | C | 1.932626   | -0.130444 | -0.009381 |
|   |           |           |          | C | 4.573228   | -0.120209 | -0.017585 |
|   |           |           |          | C | 3.361723   | -0.132078 | -0.010968 |

| <b>M-3 anion</b> | <b>X</b>   | <b>Y</b>  | <b>Z</b>  |
|------------------|------------|-----------|-----------|
| C                | -5.976214  | -0.06106  | 0.066279  |
| C                | -6.733161  | -0.922001 | -0.775559 |
| C                | -8.110652  | -0.893982 | -0.781196 |
| H                | -8.641837  | -1.58447  | -1.426698 |
| C                | -8.831054  | -0.002871 | 0.039385  |
| C                | -8.089133  | 0.830088  | 0.90279   |
| H                | -8.609906  | 1.499649  | 1.580029  |
| C                | -6.712859  | 0.806748  | 0.919797  |
| H                | -6.167358  | 1.457999  | 1.59453   |
| C                | -10.320329 | 0.038472  | 0.046941  |
| C                | -11.139276 | 0.920324  | -1.12824  |
| B                | -11.188065 | -0.767364 | -1.201674 |
| H                | -10.594907 | -1.30955  | -2.062268 |
| B                | -12.610184 | 0.228535  | -1.559119 |
| H                | -12.951647 | 0.3026    | -2.689154 |
| B                | -12.531233 | 1.666599  | -0.541087 |
| H                | -12.817655 | 2.729804  | -0.973399 |
| B                | -11.056143 | 1.551118  | 0.434609  |
| H                | -10.356117 | 2.48046   | 0.621509  |
| B                | -12.753088 | -1.191156 | -0.506353 |
| H                | -13.31859  | -2.165723 | -0.873133 |
| B                | -13.587853 | 0.324011  | -0.088225 |
| H                | -14.766575 | 0.433035  | -0.14905  |
| B                | -12.615386 | 1.155118  | 1.151142  |
| H                | -13.083337 | 1.860045  | 1.98065   |

|   |            |           |           |
|---|------------|-----------|-----------|
| B | -11.20322  | 0.145277  | 1.498525  |
| H | -10.583565 | 0.129013  | 2.504872  |
| B | -11.287715 | -1.298944 | 0.47993   |
| H | -10.71732  | -2.285786 | 0.793026  |
| B | -12.770029 | -0.614308 | 1.171138  |
| H | -13.354946 | -1.184943 | 2.029735  |
| H | -10.486952 | 1.393918  | -1.851313 |
| H | -6.203439  | -1.616842 | -1.418723 |
| C | -1.211183  | 0.782877  | 0.924176  |
| C | -1.209796  | -0.916197 | -0.819698 |
| C | 0.160215   | 0.788839  | 0.916928  |
| H | -1.757174  | 1.434458  | 1.599417  |
| C | 0.161683   | -0.905733 | -0.826024 |
| H | -1.754507  | -1.574571 | -1.489379 |
| C | 0.899726   | -0.053451 | 0.041205  |
| H | 0.706032   | 1.446222  | 1.587348  |
| H | 0.708618   | -1.556803 | -1.501675 |
| C | 2.303348   | -0.042548 | 0.032826  |
| C | 3.527438   | -0.030885 | 0.02559   |
| C | 4.938145   | -0.018036 | 0.017257  |
| C | 5.667943   | 0.79401   | 0.915383  |
| C | 5.671645   | -0.81691  | -0.889609 |
| C | 7.05207    | 0.796153  | 0.913769  |
| H | 5.122095   | 1.409068  | 1.622622  |
| C | 7.055495   | -0.79481  | -0.903948 |
| H | 5.128481   | -1.441591 | -1.590463 |
| C | 7.758053   | 0.006708  | 0.000952  |
| H | 7.604152   | 1.404388  | 1.62476   |
| H | 7.609994   | -1.393435 | -1.621173 |
| C | 9.982009   | 1.142373  | -0.142721 |
| C | 10.000505  | -1.093527 | 0.121339  |
| C | 9.606018   | 2.475525  | -0.323359 |
| C | 11.340363  | 0.753252  | -0.101598 |
| C | 9.6464     | -2.432015 | 0.306842  |
| C | 11.352236  | -0.683937 | 0.06589   |
| C | 10.618587  | 3.415872  | -0.444993 |
| H | 8.559635   | 2.756864  | -0.371311 |
| C | 12.339153  | 1.721847  | -0.227218 |
| C | 10.67419   | -3.356838 | 0.418767  |
| H | 8.60494    | -2.729096 | 0.36588   |
| C | 12.366774  | -1.637325 | 0.181555  |
| C | 11.973358  | 3.049203  | -0.394454 |
| H | 10.355271  | 4.459497  | -0.586472 |
| H | 13.38667   | 1.435461  | -0.19761  |

|   |           |           |           |
|---|-----------|-----------|-----------|
| C | 12.022656 | -2.969867 | 0.353545  |
| H | 10.428185 | -4.404146 | 0.564078  |
| H | 13.409495 | -1.335243 | 0.14098   |
| H | 12.737935 | 3.812756  | -0.492947 |
| H | 12.799534 | -3.721839 | 0.444736  |
| N | 9.179302  | 0.018177  | -0.00669  |
| C | -1.95464  | -0.070391 | 0.055222  |
| C | -4.579724 | -0.072544 | 0.063693  |
| C | -3.349242 | -0.074285 | 0.059944  |

### 3.4 Cartesian coordinates of *o*-Cb dyads in the excited state

| D-1 | X         | Y          | Z         | D-2 | X         | Y         | Z         |
|-----|-----------|------------|-----------|-----|-----------|-----------|-----------|
| N   | 0.067402  | -6.377372  | 3.198924  | C   | -0.860576 | -0.053722 | -0.258948 |
| B   | 0.728161  | 0.207829   | 3.390902  | C   | -0.890592 | 0.0915    | 1.152146  |
| H   | -0.13536  | -0.101956  | 4.144541  | C   | 0.274919  | 0.246688  | 1.86113   |
| B   | 2.474271  | 0.039744   | 3.896973  | H   | 0.244683  | 0.353203  | 2.939466  |
| H   | 2.777633  | -0.388803  | 4.961469  | C   | 1.532744  | 0.264106  | 1.206503  |
| B   | 3.232862  | -0.417649  | 2.337097  | C   | 1.557816  | 0.087823  | -0.200226 |
| H   | 4.12316   | -1.193154  | 2.207479  | H   | 2.515018  | 0.070688  | -0.708769 |
| B   | 1.788954  | -0.423483  | 1.216713  | C   | 0.395217  | -0.064002 | -0.91725  |
| H   | 1.753488  | -1.235027  | 0.351278  | H   | 0.423646  | -0.194219 | -1.993711 |
| B   | 1.779181  | 1.647403   | 3.687198  | C   | 2.756388  | 0.450814  | 1.961716  |
| H   | 1.681138  | 2.351195   | 4.636426  | C   | 3.62289   | 2.497202  | 2.283416  |
| B   | 3.344208  | 1.249351   | 2.929931  | B   | 2.745229  | 1.471471  | 3.361694  |
| H   | 4.383389  | 1.676258   | 3.310219  | H   | 1.695179  | 1.850322  | 3.759864  |
| B   | 2.992544  | 0.921591   | 1.21181   | B   | 4.255552  | 2.381275  | 3.784713  |
| H   | 3.792129  | 1.087072   | 0.351986  | H   | 4.211165  | 3.359492  | 4.452941  |
| B   | 1.299468  | 1.296787   | 0.877457  | B   | 5.228193  | 2.199178  | 2.286962  |
| H   | 0.928023  | 1.637176   | -0.196589 | H   | 5.922018  | 3.040094  | 1.820117  |
| B   | 0.538108  | 1.748475   | 2.433608  | B   | 4.125562  | 1.211926  | 1.237009  |
| H   | -0.417015 | 2.44235    | 2.555733  | H   | 4.099093  | 1.409619  | 0.06838   |
| B   | 2.196324  | 2.265426   | 2.067789  | B   | 4.000251  | 0.768031  | 4.44703   |
| H   | 2.426763  | 3.407938   | 1.847748  | H   | 3.85537   | 0.646881  | 5.61726   |
| C   | 1.807941  | -1.013897  | 2.845206  | B   | 5.565963  | 1.181314  | 3.704064  |
| C   | 0.312643  | 0.303963   | 1.715507  | H   | 6.558776  | 1.350189  | 4.329819  |
| C   | 0.780326  | -7.572598  | 3.181445  | B   | 5.548405  | 0.479195  | 2.066617  |
| C   | 2.161798  | -7.759222  | 3.223266  | H   | 6.535189  | 0.150259  | 1.498337  |
| H   | 2.841919  | -6.916817  | 3.273091  | B   | 4.090423  | -0.490461 | 1.867558  |
| C   | 2.622463  | -9.072821  | 3.213185  | H   | 4.030307  | -1.41532  | 1.127649  |
| H   | 3.690002  | -9.259751  | 3.240128  | B   | 3.115282  | -0.305399 | 3.364985  |
| C   | 1.734707  | -10.151854 | 3.179734  | H   | 2.32018   | -1.092798 | 3.758413  |
| H   | 2.125691  | -11.163256 | 3.175492  | B   | 4.884581  | -0.419912 | 3.455626  |
| C   | 0.349814  | -9.950682  | 3.164864  | H   | 5.391547  | -1.393533 | 3.903719  |

|   |           |            |           |   |            |           |           |
|---|-----------|------------|-----------|---|------------|-----------|-----------|
| H | -0.328579 | -10.797564 | 3.158159  | H | -1.848878  | 0.080368  | 1.66032   |
| C | -0.132446 | -8.652209  | 3.16678   | C | -4.412938  | -0.456135 | -3.658575 |
| C | -1.468241 | -8.062984  | 3.177526  | C | -5.562358  | -0.37168  | -1.515058 |
| C | -2.746688 | -8.580305  | 3.149689  | C | -5.62784   | -0.532615 | -4.3053   |
| H | -2.894124 | -9.65575   | 3.12553   | H | -3.488559  | -0.477714 | -4.224889 |
| C | -3.862034 | -7.713122  | 3.137355  | C | -6.776631  | -0.450928 | -2.161646 |
| C | -3.640683 | -6.324767  | 3.111376  | H | -5.521179  | -0.287927 | -0.434755 |
| H | -4.484008 | -5.645646  | 3.059044  | C | -6.824689  | -0.529082 | -3.565539 |
| C | -2.365351 | -5.774759  | 3.126717  | H | -5.671954  | -0.635735 | -5.384022 |
| H | -2.213179 | -4.702759  | 3.073394  | H | -7.703723  | -0.412877 | -1.600088 |
| C | -1.283191 | -6.658436  | 3.190492  | C | -8.416791  | 0.126101  | -5.364785 |
| C | -5.267198 | -8.308701  | 3.105598  | C | -9.139963  | -1.405528 | -3.847343 |
| C | -5.479805 | -8.99741   | 1.74497   | C | -7.702612  | 1.107334  | -6.053455 |
| H | -6.483782 | -9.431383  | 1.699735  | C | -9.736677  | -0.215534 | -5.72248  |
| H | -5.376952 | -8.279041  | 0.926772  | C | -9.23231   | -2.349294 | -2.823636 |
| H | -4.755598 | -9.801935  | 1.586004  | C | -10.197732 | -1.19374  | -4.754714 |
| C | -6.345647 | -7.237173  | 3.294868  | C | -8.324009  | 1.705896  | -7.142742 |
| H | -6.361007 | -6.506452  | 2.47892   | H | -6.70889   | 1.409736  | -5.744613 |
| H | -7.328988 | -7.716199  | 3.331375  | C | -10.339454 | 0.398722  | -6.817594 |
| H | -6.201677 | -6.697046  | 4.237071  | C | -10.429548 | -3.043574 | -2.698838 |
| C | -5.422061 | -9.344049  | 4.234245  | H | -8.400044  | -2.551516 | -2.159681 |
| H | -5.258324 | -8.883227  | 5.212781  | C | -11.387541 | -1.903191 | -4.611365 |
| H | -6.434947 | -9.757571  | 4.215119  | C | -9.62288   | 1.352426  | -7.530447 |
| H | -4.724734 | -10.179079 | 4.129171  | H | -7.790884  | 2.470609  | -7.697539 |
| C | -0.97545  | -0.238     | 1.28604   | H | -11.355642 | 0.142355  | -7.100503 |
| C | -1.106779 | -0.978143  | 0.096462  | C | -11.500647 | -2.820325 | -3.573738 |
| C | -2.13221  | -0.042738  | 2.066742  | H | -10.530888 | -3.781023 | -1.909749 |
| C | -2.326524 | -1.511248  | -0.287326 | H | -12.206966 | -1.747    | -5.305946 |
| H | -0.231944 | -1.143172  | -0.522219 | H | -10.077075 | 1.839411  | -8.386334 |
| C | -3.358744 | -0.549556  | 1.67552   | H | -12.421145 | -3.379291 | -3.44599  |
| H | -2.059764 | 0.544363   | 2.976258  | N | -8.055101  | -0.601107 | -4.222401 |
| C | -3.465461 | -1.297047  | 0.495825  | C | -4.351251  | -0.369936 | -2.247626 |
| H | -2.404399 | -2.108765  | -1.190126 | C | -2.057808  | -0.180346 | -0.976666 |
| H | -4.249827 | -0.345348  | 2.260846  | C | -3.120126  | -0.2757   | -1.579851 |
| C | -5.280357 | -1.642843  | -1.182768 | C | 2.993258   | 3.680589  | 1.716603  |
| C | -5.647315 | -2.454317  | 0.894179  | C | 3.386065   | 4.168412  | 0.449975  |
| C | -4.758921 | -0.995623  | -2.305163 | C | 1.987944   | 4.382253  | 2.418587  |
| C | -6.574643 | -2.205536  | -1.191421 | C | 2.798475   | 5.289626  | -0.094068 |
| C | -5.553476 | -2.861301  | 2.224871  | H | 4.17206    | 3.653061  | -0.090818 |
| C | -6.81484  | -2.715809  | 0.143633  | C | 1.394954   | 5.502835  | 1.877783  |
| C | -5.547422 | -0.959641  | -3.44765  | H | 1.688767   | 4.033347  | 3.400513  |
| H | -3.783029 | -0.525     | -2.281948 | C | 1.782246   | 5.976255  | 0.605669  |
| C | -7.347113 | -2.155987  | -2.351248 | H | 3.112155   | 5.658441  | -1.064716 |
| C | -6.664549 | -3.473237  | 2.801242  | H | 0.624297   | 6.035255  | 2.424818  |

|   |            |           |           |   |           |           |           |
|---|------------|-----------|-----------|---|-----------|-----------|-----------|
| H | -4.652777  | -2.685677 | 2.8038    | C | 1.166056  | 7.11943   | 0.047029  |
| C | -7.906899  | -3.32908  | 0.746362  | C | 0.62957   | 8.103519  | -0.431427 |
| C | -6.82405   | -1.538802 | -3.479466 | C | 0.007513  | 9.247145  | -0.990218 |
| H | -5.165317  | -0.464576 | -4.334405 | C | 0.395613  | 9.727239  | -2.256011 |
| H | -8.34392   | -2.586526 | -2.367054 | C | -1.011205 | 9.924741  | -0.292    |
| C | -7.860519  | -3.699442 | 2.093659  | C | -0.208426 | 10.845436 | -2.802208 |
| H | -6.596795  | -3.763555 | 3.844716  | H | 1.189849  | 9.218241  | -2.790864 |
| H | -8.808348  | -3.499702 | 0.163328  | C | -1.62249  | 11.036382 | -0.84218  |
| H | -7.409999  | -1.493315 | -4.391035 | H | -1.323803 | 9.552725  | 0.677448  |
| N | -4.719423  | -1.805976 | 0.084987  | C | -1.225386 | 11.507033 | -2.100917 |
| C | -9.119983  | -4.275575 | 2.749993  | H | 0.115205  | 11.234233 | -3.762061 |
| C | -9.577449  | -5.535521 | 1.997029  | H | -2.42971  | 11.537929 | -0.318762 |
| H | -10.482437 | -5.94434  | 2.458939  | C | -2.100974 | 13.84021  | -1.990994 |
| H | -9.806969  | -5.319197 | 0.950028  | C | -2.368319 | 12.731011 | -3.95105  |
| H | -8.801456  | -6.306352 | 2.018833  | C | -1.726547 | 14.235364 | -0.70587  |
| C | -8.89638   | -4.642081 | 4.220051  | C | -2.783328 | 14.712335 | -2.864196 |
| H | -8.119435  | -5.40406  | 4.333764  | C | -2.408312 | 11.769443 | -4.961447 |
| H | -8.614389  | -3.767252 | 4.814047  | C | -2.955642 | 14.003026 | -4.116673 |
| H | -9.822702  | -5.044835 | 4.640257  | C | -2.083614 | 15.51435  | -0.299492 |
| C | -10.238161 | -3.21959  | 2.688034  | H | -1.165032 | 13.576654 | -0.053039 |
| H | -9.935944  | -2.305964 | 3.208404  | C | -3.130106 | 15.992418 | -2.432661 |
| H | -10.48201  | -2.954482 | 1.655487  | C | -3.021141 | 12.121223 | -6.157057 |
| H | -11.148019 | -3.603024 | 3.162276  | H | -1.989563 | 10.780057 | -4.816646 |
| C | 1.484232   | -2.41637  | 3.042915  | C | -3.565733 | 14.331818 | -5.326827 |
| C | 0.610018   | -2.835191 | 4.070945  | C | -2.784244 | 16.384549 | -1.146705 |
| C | 1.979651   | -3.399399 | 2.152183  | H | -1.806349 | 15.846984 | 0.695382  |
| C | 0.169542   | -4.140268 | 4.143385  | H | -3.656343 | 16.671374 | -3.096761 |
| H | 0.268325   | -2.109595 | 4.799431  | C | -3.589248 | 13.389219 | -6.345429 |
| C | 1.555625   | -4.708924 | 2.222762  | H | -3.065187 | 11.393332 | -6.960655 |
| H | 2.674181   | -3.098219 | 1.37596   | H | -4.02056  | 15.308143 | -5.464142 |
| C | 0.616471   | -5.077248 | 3.199398  | H | -3.048639 | 17.375839 | -0.795012 |
| H | -0.507566  | -4.457197 | 4.930805  | H | -4.058805 | 13.6292   | -7.293201 |
| H | 1.890425   | -5.441283 | 1.49451   | N | -1.849901 | 12.637531 | -2.65681  |

| <b>D-3</b> | X          | Y         | Z          | <b>M-3 (LE)</b> | X         | Y         | Z         |
|------------|------------|-----------|------------|-----------------|-----------|-----------|-----------|
| C          | -17.908804 | -0.863575 | -9.646065  | C               | -5.964141 | -0.010674 | 0.037502  |
| C          | -16.669233 | -0.89095  | -9.042959  | C               | -6.699829 | -0.904952 | -0.773996 |
| H          | -16.539399 | -1.391085 | -8.091381  | C               | -8.081316 | -0.88154  | -0.779455 |
| C          | -15.545574 | -0.272041 | -9.648388  | H               | -8.614352 | -1.594792 | -1.395953 |
| C          | -15.727278 | 0.353483  | -10.909105 | C               | -8.792312 | 0.036355  | 0.009136  |
| H          | -14.872733 | 0.810082  | -11.393056 | C               | -8.065762 | 0.907429  | 0.837851  |
| C          | -16.964118 | 0.382601  | -11.51731  | H               | -8.592812 | 1.599711  | 1.484674  |
| H          | -17.092178 | 0.864186  | -12.479571 | C               | -6.685405 | 0.891222  | 0.85438   |



|   |            |           |            |   |            |           |           |
|---|------------|-----------|------------|---|------------|-----------|-----------|
| C | -14.24816  | -0.281142 | -9.000323  | H | -6.138661  | 1.570796  | 1.498749  |
| C | -13.657715 | 1.36037   | -7.546864  | C | -10.294348 | 0.059197  | 0.028933  |
| B | -14.143909 | -0.289154 | -7.262885  | C | -11.123764 | 0.87068   | -1.149657 |
| H | -15.132408 | -0.481458 | -6.642694  | B | -11.153865 | -0.823909 | -1.171725 |
| B | -12.724234 | 0.544315  | -6.460376  | H | -10.553378 | -1.37848  | -2.019142 |
| H | -12.780095 | 0.904816  | -5.334943  | B | -12.593379 | 0.135973  | -1.535932 |
| B | -12.040572 | 1.514275  | -7.827652  | H | -12.948769 | 0.170608  | -2.662222 |
| H | -11.584796 | 2.60139   | -7.727244  | B | -12.526203 | 1.613088  | -0.568388 |
| B | -13.177269 | 1.081924  | -9.197391  | H | -12.835582 | 2.652339  | -1.03827  |
| H | -13.460266 | 1.897494  | -10.006511 | B | -11.042627 | 1.568083  | 0.392562  |
| B | -12.596219 | -1.164783 | -6.903221  | H | -10.348725 | 2.51065   | 0.531586  |
| H | -12.484068 | -1.968178 | -6.042379  | B | -12.69341  | -1.248103 | -0.431576 |
| B | -11.278933 | -0.02762  | -7.341708  | H | -13.241015 | -2.246962 | -0.752932 |
| H | -10.222457 | -0.020528 | -6.809323  | B | -13.548215 | 0.264848  | -0.051686 |
| B | -11.512293 | 0.373375  | -9.075674  | H | -14.728025 | 0.349045  | -0.098385 |
| H | -10.617242 | 0.679208  | -9.785881  | B | -12.579449 | 1.159483  | 1.143012  |
| B | -12.814498 | -0.632197 | -9.732049  | H | -13.046737 | 1.883116  | 1.954638  |
| H | -12.860819 | -0.942727 | -10.872782 | B | -11.138839 | 0.192699  | 1.50083   |
| B | -13.495729 | -1.60286  | -8.364605  | H | -10.490061 | 0.222468  | 2.488248  |
| H | -14.05413  | -2.639516 | -8.479594  | B | -11.207085 | -1.290292 | 0.532021  |
| B | -11.738564 | -1.30229  | -8.473184  | H | -10.598086 | -2.245845 | 0.86837   |
| H | -11.004646 | -2.191732 | -8.737177  | B | -12.691603 | -0.612975 | 1.227234  |
| H | -18.760643 | -1.337003 | -9.172333  | H | -13.246115 | -1.166385 | 2.114713  |
| C | -14.567161 | 2.445151  | -7.231661  | H | -10.498591 | 1.334599  | -1.902692 |
| C | -14.557538 | 3.648006  | -7.983849  | H | -6.164356  | -1.618781 | -1.390182 |
| C | -15.487865 | 2.33754   | -6.158021  | C | -1.20577   | 0.870665  | 0.871994  |
| C | -15.432538 | 4.674812  | -7.697347  | C | -1.207054  | -0.937359 | -0.786626 |
| H | -13.843475 | 3.752869  | -8.791205  | C | 0.16129    | 0.873272  | 0.871466  |
| C | -16.365203 | 3.360536  | -5.867568  | H | -1.75858   | 1.557497  | 1.503762  |
| H | -15.490259 | 1.434853  | -5.559949  | C | 0.160059   | -0.938424 | -0.789685 |
| C | -16.366855 | 4.551513  | -6.637979  | H | -1.76069   | -1.625386 | -1.416367 |
| H | -15.41662  | 5.588404  | -8.279758  | C | 0.89549    | -0.031419 | 0.039079  |
| H | -17.065467 | 3.267166  | -5.045941  | H | 0.71351    | 1.561569  | 1.502194  |
| C | -18.089862 | -0.214355 | -10.893986 | H | 0.711366   | -1.626585 | -1.421365 |
| C | -19.359213 | -0.152806 | -11.498147 | C | 2.280983   | -0.027974 | 0.034788  |
| C | -20.465013 | -0.078637 | -12.02083  | C | 3.516998   | -0.02299  | 0.029912  |
| C | -21.737841 | 0.023024  | -12.617723 | C | 4.905948   | -0.01639  | 0.023344  |
| C | -22.878647 | -0.529065 | -11.986897 | C | 5.640115   | 0.892149  | 0.841349  |
| C | -21.902136 | 0.689126  | -13.856263 | C | 5.64104    | -0.917244 | -0.802272 |
| C | -24.128173 | -0.413311 | -12.565607 | C | 7.013889   | 0.900014  | 0.829675  |
| H | -22.75725  | -1.040759 | -11.039827 | H | 5.092999   | 1.566652  | 1.490733  |
| C | -23.152278 | 0.803197  | -14.433079 | C | 7.01485    | -0.909873 | -0.805835 |
| H | -21.031572 | 1.110759  | -14.343934 | H | 5.094319   | -1.597897 | -1.445533 |
| C | -24.290882 | 0.258216  | -13.797988 | C | 7.725416   | -0.000795 | 0.00777   |

|   |            |           |            |   |           |           |           |
|---|------------|-----------|------------|---|-----------|-----------|-----------|
| H | -24.998885 | -0.834444 | -12.077751 | H | 7.566025  | 1.567671  | 1.482776  |
| H | -23.274156 | 1.314869  | -15.380112 | H | 7.566948  | -1.571528 | -1.465053 |
| C | -25.574283 | 0.394986  | -14.385913 | C | 9.934519  | 1.145744  | -0.060948 |
| C | -26.674365 | 0.529658  | -14.893304 | C | 9.948421  | -1.121063 | 0.048302  |
| C | -27.954747 | 0.702248  | -15.488608 | C | 9.567558  | 2.48547   | -0.194415 |
| C | -29.111879 | 0.191357  | -14.86939  | C | 11.287167 | 0.744931  | -0.050873 |
| C | -28.087817 | 1.395793  | -16.707312 | C | 9.598521  | -2.464732 | 0.187786  |
| C | -30.361515 | 0.378072  | -15.443442 | C | 11.29607  | -0.7048   | 0.018772  |
| H | -29.01839  | -0.334078 | -13.926554 | C | 10.588763 | 3.424647  | -0.268971 |
| C | -29.335441 | 1.570098  | -17.288611 | H | 8.527864  | 2.785069  | -0.255786 |
| H | -27.200378 | 1.780106  | -17.195651 | C | 12.293098 | 1.704692  | -0.13084  |
| C | -30.482751 | 1.067862  | -16.658086 | C | 10.631218 | -3.392232 | 0.24807   |
| H | -31.254808 | 0.01601   | -14.948023 | H | 8.56333   | -2.775982 | 0.264795  |
| H | -29.433011 | 2.07414   | -18.242988 | C | 12.313843 | -1.653092 | 0.084512  |
| C | -17.279812 | 5.583487  | -6.351188  | C | 11.936739 | 3.044808  | -0.229711 |
| C | -18.088697 | 6.466873  | -6.093569  | H | 10.333125 | 4.474192  | -0.369637 |
| C | -19.032073 | 7.468788  | -5.7886    | H | 13.337494 | 1.408263  | -0.126264 |
| C | -19.0755   | 8.676135  | -6.526304  | C | 11.974035 | -2.997118 | 0.188886  |
| C | -19.962136 | 7.281075  | -4.737714  | H | 10.389072 | -4.444523 | 0.353298  |
| C | -20.010177 | 9.650731  | -6.229392  | H | 13.354657 | -1.344923 | 0.065031  |
| H | -18.363337 | 8.825002  | -7.328865  | H | 12.708278 | 3.804523  | -0.292512 |
| C | -20.893767 | 8.256382  | -4.442126  | H | 12.755    | -3.748012 | 0.240656  |
| H | -19.932509 | 6.359358  | -4.169355  | N | 9.121161  | 0.007562  | -0.000748 |
| C | -20.938856 | 9.459709  | -5.182718  | C | -1.93807  | -0.032968 | 0.042778  |
| H | -20.039156 | 10.572257 | -6.798098  | C | -4.56005  | -0.023515 | 0.040544  |
| H | -21.605741 | 8.109051  | -3.639094  | C | -3.331811 | -0.029921 | 0.041975  |
| C | -21.911431 | 10.441364 | -4.863454  |   |           |           |           |
| C | -22.771978 | 11.244426 | -4.547125  |   |           |           |           |
| C | -23.799177 | 12.137497 | -4.134049  |   |           |           |           |
| C | -24.06993  | 13.3248   | -4.84024   |   |           |           |           |
| C | -24.575509 | 11.832215 | -2.998351  |   |           |           |           |
| C | -25.082125 | 14.178421 | -4.423305  |   |           |           |           |
| H | -23.470539 | 13.574183 | -5.707497  |   |           |           |           |
| C | -25.594713 | 12.678886 | -2.588556  |   |           |           |           |
| H | -24.377787 | 10.915301 | -2.456284  |   |           |           |           |
| C | -25.855719 | 13.859896 | -3.297797  |   |           |           |           |
| H | -25.269758 | 15.107141 | -4.949295  |   |           |           |           |
| H | -26.211984 | 12.423832 | -1.735157  |   |           |           |           |
| C | -27.887153 | 15.265501 | -3.715909  |   |           |           |           |
| C | -27.11517  | 15.169118 | -1.570025  |   |           |           |           |
| C | -28.113972 | 15.070357 | -5.07971   |   |           |           |           |
| C | -28.74923  | 16.064771 | -2.928602  |   |           |           |           |
| C | -26.371019 | 14.939553 | -0.411184  |   |           |           |           |
| C | -28.256746 | 16.005282 | -1.563665  |   |           |           |           |

|   |            |           |            |
|---|------------|-----------|------------|
| C | -29.207287 | 15.716946 | -5.650902  |
| H | -27.474161 | 14.430201 | -5.6744    |
| C | -29.83898  | 16.703883 | -3.523623  |
| C | -26.809486 | 15.539848 | 0.766594   |
| H | -25.477171 | 14.328278 | -0.42429   |
| C | -28.677715 | 16.595892 | -0.370602  |
| C | -30.05968  | 16.531142 | -4.88677   |
| H | -29.40554  | 15.583026 | -6.70794   |
| H | -30.505164 | 17.319351 | -2.929176  |
| C | -27.953641 | 16.354686 | 0.792923   |
| H | -26.25146  | 15.37661  | 1.68121    |
| H | -29.552183 | 17.23693  | -0.354591  |
| H | -30.899554 | 17.02084  | -5.364443  |
| H | -28.267916 | 16.803635 | 1.727374   |
| C | -32.72931  | 0.267015  | -17.4303   |
| C | -32.252055 | 2.47769   | -17.734185 |
| C | -32.676201 | -1.100017 | -17.151684 |
| C | -33.859334 | 0.854492  | -18.046732 |
| C | -31.672703 | 3.747886  | -17.724536 |
| C | -33.556548 | 2.262137  | -18.238006 |
| C | -33.792419 | -1.868022 | -17.474549 |
| H | -31.796717 | -1.554666 | -16.712979 |
| C | -34.967126 | 0.06427   | -18.360794 |
| C | -32.412871 | 4.798856  | -18.260241 |
| H | -30.688834 | 3.917352  | -17.304808 |
| C | -34.279657 | 3.331433  | -18.770423 |
| C | -34.930039 | -1.295537 | -18.067102 |
| H | -33.778135 | -2.93182  | -17.26809  |
| H | -35.838624 | 0.503924  | -18.833082 |
| C | -33.70017  | 4.596501  | -18.784776 |
| H | -31.986135 | 5.795071  | -18.267011 |
| H | -35.279481 | 3.17785   | -19.161174 |
| H | -35.781205 | -1.9221   | -18.304643 |
| H | -34.246833 | 5.436321  | -19.196387 |
| N | -26.893141 | 14.720926 | -2.883946  |
| N | -31.751884 | 1.259511  | -17.24247  |

| <b>M-2(LE)</b> | <b>X</b> | <b>Y</b>  | <b>Z</b> | <b>M-2*(CT)</b> | <b>X</b> | <b>Y</b>  | <b>Z</b>  |
|----------------|----------|-----------|----------|-----------------|----------|-----------|-----------|
| C              | 2.345529 | -0.082476 | 0.167601 | C               | 2.205706 | 0.068828  | 0.383903  |
| C              | 3.07007  | 1.065168  | -0.26806 | C               | 2.916246 | 1.18358   | -0.104924 |
| C              | 4.445747 | 1.066075  | -0.2834  | C               | 4.295668 | 1.189996  | -0.122798 |
| H              | 4.967704 | 1.961666  | -0.60167 | H               | 4.831277 | 2.057443  | -0.494378 |
| C              | 5.18548  | -0.064108 | 0.123057 | C               | 5.04057  | 0.083564  | 0.34576   |
| C              | 4.475857 | -1.190206 | 0.586095 | C               | 4.320162 | -1.029546 | 0.836407  |

|   |           |           |           |   |           |           |           |
|---|-----------|-----------|-----------|---|-----------|-----------|-----------|
| H | 5.015798  | -2.056788 | 0.94828   | H | 4.874762  | -1.885458 | 1.207141  |
| C | 3.099222  | -1.209864 | 0.604766  | C | 2.940757  | -1.036445 | 0.85789   |
| H | 2.570897  | -2.086252 | 0.964191  | H | 2.404167  | -1.897917 | 1.243923  |
| C | 6.679985  | -0.021854 | 0.131326  | C | 6.48522   | 0.089881  | 0.324574  |
| C | 7.547577  | -0.667466 | -1.137123 | C | 7.757437  | -0.65409  | -1.468999 |
| B | 7.443787  | 1.016781  | -1.012701 | B | 7.38219   | 0.898196  | -0.953944 |
| H | 6.763295  | 1.585476  | -1.789255 | H | 6.769061  | 1.608839  | -1.684237 |
| B | 8.946693  | 0.211124  | -1.486627 | B | 9.05714   | 0.318813  | -1.475669 |
| H | 9.275557  | 0.29768   | -2.618561 | H | 9.530559  | 0.631272  | -2.52009  |
| B | 9.012862  | -1.342377 | -0.647499 | B | 9.074038  | -1.317882 | -0.788288 |
| H | 9.387671  | -2.313932 | -1.206663 | H | 9.560941  | -2.273972 | -1.299388 |
| B | 7.554197  | -1.489894 | 0.3431    | B | 7.403343  | -1.376839 | 0.001469  |
| H | 6.962921  | -2.505776 | 0.418143  | H | 6.803396  | -2.403752 | 0.004394  |
| B | 8.965489  | 1.499934  | -0.27028  | B | 8.909431  | 1.463145  | -0.137792 |
| H | 9.426333  | 2.563055  | -0.513187 | H | 9.372243  | 2.552032  | -0.253473 |
| B | 9.945209  | 0.032165  | -0.037615 | B | 9.921294  | 0.000298  | 0.036222  |
| H | 11.126688 | 0.042122  | -0.112875 | H | 11.109502 | 0.028486  | 0.075998  |
| B | 9.077569  | -1.030748 | 1.096151  | B | 8.934292  | -1.164092 | 0.96564   |
| H | 9.619859  | -1.784601 | 1.83047   | H | 9.415083  | -2.000682 | 1.660303  |
| B | 7.578917  | -0.215885 | 1.568031  | B | 7.467533  | -0.372119 | 1.530681  |
| H | 6.957762  | -0.382401 | 2.55998   | H | 6.935916  | -0.703366 | 2.541482  |
| B | 7.509739  | 1.341096  | 0.725525  | B | 7.451623  | 1.289551  | 0.834385  |
| H | 6.849515  | 2.220539  | 1.15945   | H | 6.906722  | 2.23432   | 1.308143  |
| B | 9.058941  | 0.7294    | 1.328163  | B | 8.971394  | 0.564778  | 1.401403  |
| H | 9.59445   | 1.251129  | 2.2465    | H | 9.493993  | 0.981755  | 2.385415  |
| H | 6.938025  | -1.113561 | -1.913186 | H | 7.298024  | -1.036827 | -2.370614 |
| H | 2.519055  | 1.94517   | -0.581338 | H | 2.360476  | 2.044654  | -0.463714 |
| C | -2.406261 | -1.231324 | 0.674214  | C | -2.56387  | -1.058561 | 0.927079  |
| C | -2.409958 | 1.057302  | -0.223905 | C | -2.584522 | 1.159364  | -0.029086 |
| C | -3.774454 | -1.226661 | 0.686521  | C | -3.950127 | -1.05919  | 0.955792  |
| H | -1.857294 | -2.094337 | 1.034165  | H | -2.009682 | -1.913762 | 1.298159  |
| C | -3.777908 | 1.063515  | -0.198256 | C | -3.97102  | 1.150381  | -0.020688 |
| H | -1.864384 | 1.916319  | -0.598328 | H | -2.046432 | 2.018414  | -0.414624 |
| C | -4.49166  | -0.078764 | 0.254044  | C | -4.661152 | 0.043028  | 0.476837  |
| H | -4.324157 | -2.076067 | 1.079452  | H | -4.494771 | -1.90799  | 1.35811   |
| H | -4.33165  | 1.91767   | -0.574826 | H | -4.532055 | 1.995309  | -0.408416 |
| C | -6.713791 | -1.102792 | -0.182733 | C | -6.891902 | -1.037118 | 0.151024  |
| C | -6.694116 | 0.962256  | 0.749563  | C | -6.891976 | 1.105954  | 0.857639  |
| C | -6.35773  | -2.299063 | -0.808043 | C | -6.529859 | -2.305836 | -0.306411 |
| C | -8.063135 | -0.730363 | 0.00644   | C | -8.245046 | -0.658743 | 0.29466   |
| C | -6.313579 | 2.156809  | 1.363856  | C | -6.52933  | 2.377976  | 1.305401  |
| C | -8.05056  | 0.599663  | 0.595073  | C | -8.2451   | 0.716854  | 0.746031  |
| C | -7.389356 | -3.149244 | -1.190517 | C | -7.552231 | -3.197888 | -0.596645 |
| H | -5.321216 | -2.54642  | -1.004147 | H | -5.487888 | -2.576904 | -0.436476 |

|   |            |           |           |   |            |           |           |
|---|------------|-----------|-----------|---|------------|-----------|-----------|
| C | -9.076424  | -1.593173 | -0.389265 | C | -9.253917  | -1.577043 | -0.003472 |
| C | -7.329072  | 3.015024  | 1.77084   | C | -7.551662  | 3.26231   | 1.618531  |
| H | -5.270608  | 2.396925  | 1.533011  | H | -5.486801  | 2.657599  | 1.410399  |
| C | -9.047205  | 1.470322  | 1.014992  | C | -9.253949  | 1.62754   | 1.066859  |
| C | -8.730443  | -2.809377 | -0.977609 | C | -8.902125  | -2.844352 | -0.443758 |
| H | -7.147426  | -4.089196 | -1.674561 | H | -7.299492  | -4.191315 | -0.953684 |
| H | -10.118634 | -1.322457 | -0.252463 | H | -10.298009 | -1.298219 | 0.105636  |
| C | -8.677561  | 2.684811  | 1.592446  | C | -8.901929  | 2.898063  | 1.497567  |
| H | -7.06792   | 3.953835  | 2.247107  | H | -7.298398  | 4.25815   | 1.968428  |
| H | -10.094492 | 1.207037  | 0.905147  | H | -10.298064 | 1.340312  | 0.982663  |
| H | -9.51077   | -3.494838 | -1.289932 | H | -9.674571  | -3.569199 | -0.678268 |
| H | -9.444467  | 3.376552  | 1.92361   | H | -9.674243  | 3.617181  | 1.749497  |
| N | -5.885125  | -0.073479 | 0.273085  | N | -6.079759  | 0.037526  | 0.494922  |
| C | -1.664532  | -0.089892 | 0.214944  | C | -1.85339   | 0.052864  | 0.439044  |
| C | 0.955603   | -0.092222 | 0.181853  | C | 0.785435   | 0.062066  | 0.402826  |
| C | -0.282957  | -0.093335 | 0.197018  | C | -0.430729  | 0.057678  | 0.419601  |

## 4. References

- S1. J. Cosier, A.M. Glazer, *J. Appl. Cryst.*, 1986, **19**, 105.
- S2. P. Coppens in *Crystallographic Computing*, ed F.R. Ahmed, S.R. Hall and C.P. Huber, Copenhagen, Munksgaard, 1970, pp 255-270.
- S3. *CrysAlisPro*, Agilent Technologies, Yarnton, England, 2013.
- S4. G. M. Sheldrick, *Acta Crystallogr., Sect. A: Found. Crystallogr.*, 2008, **64**, 112.
- S5. G.M. Sheldrick, *Acta Crystallogr., Sect. C: Struct. Chem.*, 2015, **71**, 3.
- S6. O. V. Dolomanov, L. J. Bourhis, R. J. Gildea, J. A. K. Howard and H. Puschmann, *J. Appl. Crystallogr.*, 2009, **42**, 339.
- S7. A.L. Spek, *Acta Crystallogr., Sect. C: Struct. Chem.*, 2015, **71**, 9.
